# Supplementary material for: The Vasculome of the Mouse Brain
Source: PLoS One. 2012 Dec 20;7(12):e52665. doi: 10.1371/journal.pone.0052665 (PMC3527566; doi:10.1371/journal.pone.0052665)
Supplement: Table S2 — Full list of GWAS disease associated genes expressed in brain vasculome. The label “brain EC expressed” indicates whether the gene is expressed in brain vasculome (True) or not (False). (XLSX) [file pone.0052665.s003.xlsx]

## Sheet: Sheet1
Table S2: list of disease associated genes expressed in brain endothelial cells
	Note: The column “brain EC expressed” indicate that the gene is expressed in brain vasculome (True) or not (False).
entrez ID	group	symbol	description	brain EC expressed
268859	gwas.alz.mm	A2bp1	ataxin 2 binding protein 1	TRUE
11303	gwas.alz.mm	Abca1	ATP-binding cassette, sub-family A (ABC1), member 1	TRUE
20928	gwas.alz.mm	Abcc9	ATP-binding cassette, sub-family C (CFTR/MRP), member 9	TRUE
27494	gwas.alz.mm	Amot	angiomotin	TRUE
20238	gwas.alz.mm	Atxn1	ataxin 1	TRUE
30948	gwas.alz.mm	Bin1	bridging integrator 1	TRUE
12226	gwas.alz.mm	Btg1	B-cell translocation gene 1, anti-proliferative	TRUE
12488	gwas.alz.mm	Cd2ap	CD2-associated protein	TRUE
66917	gwas.alz.mm	Chordc1	cysteine and histidine-rich domain (CHORD)-containing, zinc-binding protein 1	TRUE
12759	gwas.alz.mm	Clu	clusterin	TRUE
12764	gwas.alz.mm	Cmas	cytidine monophospho-N-acetylneuraminic acid synthetase	TRUE
66797	gwas.alz.mm	Cntnap2	contactin associated protein-like 2	TRUE
93687	gwas.alz.mm	Csnk1a1	casein kinase 1, alpha 1	TRUE
14007	gwas.alz.mm	Cugbp2	CUG triplet repeat, RNA binding protein 2	TRUE
52874	gwas.alz.mm	D19Bwg1357e	DNA segment, Chr 19, Brigham & Women's Genetics 1357 expressed	TRUE
14586	gwas.alz.mm	Gfra2	glial cell line derived neurotrophic factor family receptor alpha 2	TRUE
15247	gwas.alz.mm	Hiat1	hippocampus abundant gene transcript 1	TRUE
66419	gwas.alz.mm	Mrpl11	mitochondrial ribosomal protein L11	TRUE
215819	gwas.alz.mm	Nhsl1	NHS-like 1	TRUE
20409	gwas.alz.mm	Ostf1	osteoclast stimulating factor 1	TRUE
224105	gwas.alz.mm	Pak2	p21 (CDKN1A)-activated kinase 2	TRUE
233489	gwas.alz.mm	Picalm	phosphatidylinositol binding clathrin assembly protein	TRUE
71795	gwas.alz.mm	Pitpnc1	phosphatidylinositol transfer protein, cytoplasmic 1	TRUE
67801	gwas.alz.mm	Pllp	plasma membrane proteolipid	TRUE
106042	gwas.alz.mm	Prickle1	prickle like 1 (Drosophila)	TRUE
30939	gwas.alz.mm	Pttg1	pituitary tumor-transforming 1	TRUE
74132	gwas.alz.mm	Rnf6	ring finger protein (C3H2C3 type) 6	TRUE
104001	gwas.alz.mm	Rtn1	reticulon 1	TRUE
70097	gwas.alz.mm	Sash1	SAM and SH3 domain containing 1	TRUE
66286	gwas.alz.mm	Sec11c	SEC11 homolog C (S. cerevisiae)	TRUE
20334	gwas.alz.mm	Sec23a	SEC23A (S. cerevisiae)	TRUE
229782	gwas.alz.mm	Slc35a3	solute carrier family 35 (UDP-N-acetylglucosamine (UDP-GlcNAc) transporter), member 3	TRUE
20442	gwas.alz.mm	St3gal1	ST3 beta-galactoside alpha-2,3-sialyltransferase 1	TRUE
20869	gwas.alz.mm	Stk11	serine/threonine kinase 11	TRUE
223255	gwas.alz.mm	Stk24	serine/threonine kinase 24 (STE20 homolog, yeast)	TRUE
217351	gwas.alz.mm	Tnrc6c	trinucleotide repeat containing 6C	TRUE
70892	gwas.alz.mm	Ttll7	tubulin tyrosine ligase-like family, member 7	TRUE
666173	gwas.alz.mm	Vps13b	vacuolar protein sorting 13B (yeast)	TRUE
26950	gwas.alz.mm	Vsnl1	visinin-like 1	TRUE
22388	gwas.alz.mm	Wdr1	WD repeat domain 1	TRUE
22601	gwas.alz.mm	Yap1	yes-associated protein 1	TRUE
69894	gwas.alz.mm	2010107G23Rik	RIKEN cDNA 2010107G23 gene	FALSE
73205	gwas.alz.mm	3110043O21Rik	RIKEN cDNA 3110043O21 gene	FALSE
73936	gwas.alz.mm	4930403N07Rik	RIKEN cDNA 4930403N07 gene	FALSE
73862	gwas.alz.mm	4930415F15Rik	RIKEN cDNA 4930415F15 gene	FALSE
74430	gwas.alz.mm	4930452B06Rik	RIKEN cDNA 4930452B06 gene	FALSE
225617	gwas.alz.mm	9430028L06Rik	RIKEN cDNA 9430028L06 gene	FALSE
97159	gwas.alz.mm	A430005L14Rik	RIKEN cDNA A430005L14 gene	FALSE
27403	gwas.alz.mm	Abca7	ATP-binding cassette, sub-family A (ABC1), member 7	FALSE
11514	gwas.alz.mm	Adcy8	adenylate cyclase 8	FALSE
68048	gwas.alz.mm	Aen	apoptosis enhancing nuclease	FALSE
621080	gwas.alz.mm	AI429214	expressed sequence AI429214	FALSE
230959	gwas.alz.mm	Ajap1	adherens junction associated protein 1	FALSE
11733	gwas.alz.mm	Ank1	ankyrin 1, erythroid	FALSE
11812	gwas.alz.mm	Apoc1	apolipoprotein C-I	FALSE
11816	gwas.alz.mm	Apoe	apolipoprotein E	FALSE
73910	gwas.alz.mm	Arhgap18	Rho GTPase activating protein 18	FALSE
319767	gwas.alz.mm	Atp10b	ATPase, class V, type 10B	FALSE
212547	gwas.alz.mm	BC027231	cDNA sequence BC027231	FALSE
239647	gwas.alz.mm	BC038822	cDNA sequence BC038822	FALSE
117606	gwas.alz.mm	Boc	biregional cell adhesion molecule-related/down-regulated by oncogenes (Cdon) binding protein	FALSE
52592	gwas.alz.mm	Brms1l	breast cancer metastasis-suppressor 1-like	FALSE
27062	gwas.alz.mm	Cadps	Ca2+-dependent secretion activator	FALSE
76457	gwas.alz.mm	Ccdc134	coiled-coil domain containing 134	FALSE
229780	gwas.alz.mm	Ccdc76	coiled-coil domain containing 76	FALSE
20299	gwas.alz.mm	Ccl22	chemokine (C-C motif) ligand 22	FALSE
260409	gwas.alz.mm	Cdc42ep3	CDC42 effector protein (Rho GTPase binding) 3	FALSE
12554	gwas.alz.mm	Cdh13	cadherin 13	FALSE
12737	gwas.alz.mm	Cldn1	claudin 1	FALSE
12808	gwas.alz.mm	Cobl	cordon-bleu	FALSE
69700	gwas.alz.mm	Col22a1	collagen, type XXII, alpha 1	FALSE
26427	gwas.alz.mm	Creb3l1	cAMP responsive element binding protein 3-like 1	FALSE
65969	gwas.alz.mm	Cubn	cubilin (intrinsic factor-cobalamin receptor)	FALSE
13123	gwas.alz.mm	Cyp7b1	cytochrome P450, family 7, subfamily b, polypeptide 1	FALSE
76820	gwas.alz.mm	D12Ertd553e	DNA segment, Chr 12, ERATO Doi 553, expressed	FALSE
13131	gwas.alz.mm	Dab1	disabled homolog 1 (Drosophila)	FALSE
13171	gwas.alz.mm	Dbt	dihydrolipoamide branched chain transacylase E2	FALSE
13179	gwas.alz.mm	Dcn	decorin	FALSE
380921	gwas.alz.mm	Dgkh	diacylglycerol kinase, eta	FALSE
56419	gwas.alz.mm	Diap3	diaphanous homolog 3 (Drosophila)	FALSE
208440	gwas.alz.mm	Dip2c	DIP2 disco-interacting protein 2 homolog C (Drosophila)	FALSE
13411	gwas.alz.mm	Dnahc11	dynein, axonemal, heavy chain 11	FALSE
13449	gwas.alz.mm	Dok2	docking protein 2	FALSE
13608	gwas.alz.mm	Edar	ectodysplasin-A receptor	FALSE
13618	gwas.alz.mm	Ednrb	endothelin receptor type B	FALSE
15569	gwas.alz.mm	Elavl2	ELAV (embryonic lethal, abnormal vision, Drosophila)-like 2 (Hu antigen B)	FALSE
68519	gwas.alz.mm	Eml1	echinoderm microtubule associated protein like 1	FALSE
227867	gwas.alz.mm	Epc2	enhancer of polycomb homolog 2 (Drosophila)	FALSE
13835	gwas.alz.mm	Epha1	Eph receptor A1	FALSE
13869	gwas.alz.mm	Erbb4	v-erb-a erythroblastic leukemia viral oncogene homolog 4 (avian)	FALSE
69940	gwas.alz.mm	Exoc1	exocyst complex component 1	FALSE
74145	gwas.alz.mm	F13a1	coagulation factor XIII, A1 subunit	FALSE
223254	gwas.alz.mm	Farp1	FERM, RhoGEF (Arhgef) and pleckstrin domain protein 1 (chondrocyte-derived)	FALSE
14115	gwas.alz.mm	Fbln2	fibulin 2	FALSE
99571	gwas.alz.mm	Fgg	fibrinogen, gamma polypeptide	FALSE
14198	gwas.alz.mm	Fhit	fragile histidine triad gene	FALSE
14241	gwas.alz.mm	Foxl1	forkhead box L1	FALSE
319710	gwas.alz.mm	Frmd6	FERM domain containing 6	FALSE
14389	gwas.alz.mm	Gab2	growth factor receptor bound protein 2-associated protein 2	FALSE
14633	gwas.alz.mm	Gli2	GLI-Kruppel family member GLI2	FALSE
237213	gwas.alz.mm	Glra2	glycine receptor, alpha 2 subunit	FALSE
24100	gwas.alz.mm	Gpr175	G protein-coupled receptor 175	FALSE
237175	gwas.alz.mm	Gpr64	G protein-coupled receptor 64	FALSE
14812	gwas.alz.mm	Grin2b	glutamate receptor, ionotropic, NMDA2B (epsilon 2)	FALSE
268934	gwas.alz.mm	Grm4	glutamate receptor, metabotropic 4	FALSE
269994	gwas.alz.mm	Gsg1l	GSG1-like	FALSE
14939	gwas.alz.mm	Gzmb	granzyme B	FALSE
319594	gwas.alz.mm	Hif1an	hypoxia-inducible factor 1, alpha subunit inhibitor	FALSE
12123	gwas.alz.mm	Hrk	harakiri, BCL2 interacting protein (contains only BH3 domain)	FALSE
22778	gwas.alz.mm	Ikzf1	IKAROS family zinc finger 1	FALSE
56069	gwas.alz.mm	Il17b	interleukin 17B	FALSE
16372	gwas.alz.mm	Irx2	Iroquois related homeobox 2 (Drosophila)	FALSE
50916	gwas.alz.mm	Irx4	Iroquois related homeobox 4 (Drosophila)	FALSE
210741	gwas.alz.mm	Kcnk12	potassium channel, subfamily K, member 12	FALSE
240776	gwas.alz.mm	Kcnt2	potassium channel, subfamily T, member 2	FALSE
240595	gwas.alz.mm	Kcnv2	potassium channel, subfamily V, member 2	FALSE
210530	gwas.alz.mm	Leprel1	leprecan-like 1	FALSE
242384	gwas.alz.mm	Lingo2	leucine rich repeat and Ig domain containing 2	FALSE
79235	gwas.alz.mm	Lrat	lecithin-retinol acyltransferase (phosphatidylcholine-retinol-O-acyltransferase)	FALSE
109245	gwas.alz.mm	Lrrc39	leucine rich repeat containing 39	FALSE
14924	gwas.alz.mm	Magi1	membrane associated guanylate kinase, WW and PDZ domain containing 1	FALSE
107029	gwas.alz.mm	Me2	malic enzyme 2, NAD(+)-dependent, mitochondrial	FALSE
17314	gwas.alz.mm	Mgmt	O-6-methylguanine-DNA methyltransferase	FALSE
66447	gwas.alz.mm	Mgst3	microsomal glutathione S-transferase 3	FALSE
17345	gwas.alz.mm	Mki67	antigen identified by monoclonal antibody Ki 67	FALSE
68533	gwas.alz.mm	Mphosph6	M phase phosphoprotein 6	FALSE
75739	gwas.alz.mm	Mpp7	membrane protein, palmitoylated 7 (MAGUK p55 subfamily member 7)	FALSE
69774	gwas.alz.mm	Ms4a6b	membrane-spanning 4-domains, subfamily A, member 6B	FALSE
17681	gwas.alz.mm	Msc	musculin	FALSE
270685	gwas.alz.mm	Mthfd1l	methylenetetrahydrofolate dehydrogenase (NADP+ dependent) 1-like	FALSE
17967	gwas.alz.mm	Ncam1	neural cell adhesion molecule 1	FALSE
17986	gwas.alz.mm	Ndp	Norrie disease (pseudoglioma) (human)	FALSE
18003	gwas.alz.mm	Nedd9	neural precursor cell expressed, developmentally down-regulated gene 9	FALSE
56183	gwas.alz.mm	Nmu	neuromedin U	FALSE
27386	gwas.alz.mm	Npas3	neuronal PAS domain protein 3	FALSE
225872	gwas.alz.mm	Npas4	neuronal PAS domain protein 4	FALSE
23966	gwas.alz.mm	Odz4	odd Oz/ten-m homolog 4 (Drosophila)	FALSE
74486	gwas.alz.mm	Osbpl10	oxysterol binding protein-like 10	FALSE
18552	gwas.alz.mm	Pcsk5	proprotein convertase subtilisin/kexin type 5	FALSE
18597	gwas.alz.mm	Pdha1	pyruvate dehydrogenase E1 alpha 1	FALSE
100710	gwas.alz.mm	Pds5b	PDS5, regulator of cohesion maintenance, homolog B (S. cerevisiae)	FALSE
50706	gwas.alz.mm	Postn	periostin, osteoblast specific factor	FALSE
243548	gwas.alz.mm	Prickle2	prickle-like 2 (Drosophila)	FALSE
18761	gwas.alz.mm	Prkcq	protein kinase C, theta	FALSE
19130	gwas.alz.mm	Prox1	prospero-related homeobox 1	FALSE
19294	gwas.alz.mm	Pvrl2	poliovirus receptor-related 2	FALSE
76897	gwas.alz.mm	Ralyl	RALY RNA binding protein-like	FALSE
69263	gwas.alz.mm	Rfc3	replication factor C (activator 1) 3	FALSE
231760	gwas.alz.mm	Rimbp2	RIMS binding protein 2	FALSE
74438	gwas.alz.mm	Rlbp1l1	retinaldehyde binding protein 1-like 1	FALSE
19883	gwas.alz.mm	Rora	RAR-related orphan receptor alpha	FALSE
71919	gwas.alz.mm	Rpap3	RNA polymerase II associated protein 3	FALSE
20191	gwas.alz.mm	Ryr2	ryanodine receptor 2, cardiac	FALSE
320825	gwas.alz.mm	Samd5	sterile alpha motif domain containing 5	FALSE
219151	gwas.alz.mm	Scara3	scavenger receptor class A, member 3	FALSE
20343	gwas.alz.mm	Sell	selectin, lymphocyte	FALSE
20344	gwas.alz.mm	Selp	selectin, platelet	FALSE
353282	gwas.alz.mm	Sfmbt2	Scm-like with four mbt domains 2	FALSE
237353	gwas.alz.mm	Sh3rf3	SH3 domain containing ring finger 3	FALSE
219134	gwas.alz.mm	Shisa2	shisa homolog 2 (Xenopus laevis)	FALSE
13340	gwas.alz.mm	Slc29a2	solute carrier family 29 (nucleoside transporters), member 2	FALSE
117591	gwas.alz.mm	Slc2a9	solute carrier family 2 (facilitated glucose transporter), member 9	FALSE
20534	gwas.alz.mm	Slc4a1ap	solute carrier family 4 (anion exchanger), member 1, adaptor protein	FALSE
14211	gwas.alz.mm	Smc2	structural maintenance of chromosomes 2	FALSE
58178	gwas.alz.mm	Sorcs1	VPS10 domain receptor protein SORCS 1	FALSE
268656	gwas.alz.mm	Sptlc1	serine palmitoyltransferase, long chain base subunit 1	FALSE
20840	gwas.alz.mm	Stac	src homology three (SH3) and cysteine rich domain	FALSE
13852	gwas.alz.mm	Stx2	syntaxin 2	FALSE
217517	gwas.alz.mm	Stxbp6	syntaxin binding protein 6 (amisyn)	FALSE
21386	gwas.alz.mm	Tbx3	T-box 3	FALSE
81879	gwas.alz.mm	Tcfcp2l1	transcription factor CP2-like 1	FALSE
53333	gwas.alz.mm	Tomm40	translocase of outer mitochondrial membrane 40 homolog (yeast)	FALSE
277328	gwas.alz.mm	Trpa1	transient receptor potential cation channel, subfamily A, member 1	FALSE
69136	gwas.alz.mm	Tusc1	tumor suppressor candidate 1	FALSE
231915	gwas.alz.mm	Uspl1	ubiquitin specific peptidase like 1	FALSE
74204	gwas.alz.mm	Xpo6	exportin 6	FALSE
30046	gwas.alz.mm	Zfp292	zinc finger protein 292	FALSE
269023	gwas.alz.mm	Zfp608	zinc finger protein 608	FALSE
76719	gwas.pd.mm	1700081L11Rik	RIKEN cDNA 1700081L11 gene	TRUE
269774	gwas.pd.mm	Aak1	AP2 associated kinase 1	TRUE
75547	gwas.pd.mm	Akap13	A kinase (PRKA) anchor protein 13	TRUE
226641	gwas.pd.mm	Atf6	activating transcription factor 6	TRUE
12380	gwas.pd.mm	Cast	calpastatin	TRUE
67974	gwas.pd.mm	Ccny	cyclin Y	TRUE
17064	gwas.pd.mm	Cd93	CD93 antigen	TRUE
214444	gwas.pd.mm	Cdk5rap2	CDK5 regulatory subunit associated protein 2	TRUE
66917	gwas.pd.mm	Chordc1	cysteine and histidine-rich domain (CHORD)-containing, zinc-binding protein 1	TRUE
66797	gwas.pd.mm	Cntnap2	contactin associated protein-like 2	TRUE
12826	gwas.pd.mm	Col4a1	collagen, type IV, alpha 1	TRUE
12977	gwas.pd.mm	Csf1	colony stimulating factor 1 (macrophage)	TRUE
14011	gwas.pd.mm	Etv6	ets variant gene 6 (TEL oncogene)	TRUE
14284	gwas.pd.mm	Fosl2	fos-like antigen 2	TRUE
15227	gwas.pd.mm	Foxf1a	forkhead box F1a	TRUE
14300	gwas.pd.mm	Frg1	FSHD region gene 1	TRUE
209630	gwas.pd.mm	Frmd4a	FERM domain containing 4A	TRUE
231580	gwas.pd.mm	Gak	cyclin G associated kinase	TRUE
15273	gwas.pd.mm	Hivep2	human immunodeficiency virus type I enhancer binding protein 2	TRUE
51810	gwas.pd.mm	Hnrnpu	heterogeneous nuclear ribonucleoprotein U	TRUE
20403	gwas.pd.mm	Itsn2	intersectin 2	TRUE
74901	gwas.pd.mm	Kbtbd11	kelch repeat and BTB (POZ) domain containing 11	TRUE
16563	gwas.pd.mm	Kif2a	kinesin family member 2A	TRUE
16598	gwas.pd.mm	Klf2	Kruppel-like factor 2 (lung)	TRUE
16783	gwas.pd.mm	Lamp1	lysosomal-associated membrane protein 1	TRUE
16909	gwas.pd.mm	Lmo2	LIM domain only 2	TRUE
17132	gwas.pd.mm	Maf	avian musculoaponeurotic fibrosarcoma (v-maf) AS42 oncogene homolog	TRUE
26401	gwas.pd.mm	Map3k1	mitogen-activated protein kinase kinase kinase 1	TRUE
212307	gwas.pd.mm	Mapre2	microtubule-associated protein, RP/EB family, member 2	TRUE
17993	gwas.pd.mm	Ndufs4	NADH dehydrogenase (ubiquinone) Fe-S protein 4	TRUE
320840	gwas.pd.mm	Negr1	neuronal growth regulator 1	TRUE
98415	gwas.pd.mm	Nucks1	nuclear casein kinase and cyclin-dependent kinase substrate 1	TRUE
18479	gwas.pd.mm	Pak1	p21 (CDKN1A)-activated kinase 1	TRUE
237459	gwas.pd.mm	Pctk2	PCTAIRE-motif protein kinase 2	TRUE
215789	gwas.pd.mm	Phactr2	phosphatase and actin regulator 2	TRUE
18798	gwas.pd.mm	Plcb4	phospholipase C, beta 4	TRUE
65112	gwas.pd.mm	Pmepa1	prostate transmembrane protein, androgen induced 1	TRUE
19279	gwas.pd.mm	Ptprr	protein tyrosine phosphatase, receptor type, R	TRUE
109905	gwas.pd.mm	Rap1a	RAS-related protein-1a	TRUE
217944	gwas.pd.mm	Rapgef5	Rap guanine nucleotide exchange factor (GEF) 5	TRUE
19735	gwas.pd.mm	Rgs2	regulator of G-protein signaling 2	TRUE
81018	gwas.pd.mm	Rnf114	ring finger protein 114	TRUE
68750	gwas.pd.mm	Rreb1	ras responsive element binding protein 1	TRUE
52822	gwas.pd.mm	Rufy3	RUN and FYVE domain containing 3	TRUE
110876	gwas.pd.mm	Scn2a1	sodium channel, voltage-gated, type II, alpha 1	TRUE
59010	gwas.pd.mm	Sqrdl	sulfide quinone reductase-like (yeast)	TRUE
21406	gwas.pd.mm	Tcf12	transcription factor 12	TRUE
21813	gwas.pd.mm	Tgfbr2	transforming growth factor, beta receptor II	TRUE
70892	gwas.pd.mm	Ttll7	tubulin tyrosine ligase-like family, member 7	TRUE
56207	gwas.pd.mm	Uchl5	ubiquitin carboxyl-terminal esterase L5	TRUE
30940	gwas.pd.mm	Usp25	ubiquitin specific peptidase 25	TRUE
218035	gwas.pd.mm	Vps41	vacuolar protein sorting 41 (yeast)	TRUE
52696	gwas.pd.mm	Zwint	ZW10 interactor	TRUE
74230	gwas.pd.mm	1700016K19Rik	RIKEN cDNA 1700016K19 gene	FALSE
72221	gwas.pd.mm	1700021F07Rik	RIKEN cDNA 1700021F07 gene	FALSE
66439	gwas.pd.mm	2010012O05Rik	RIKEN cDNA 2010012O05 gene	FALSE
72320	gwas.pd.mm	2510003E04Rik	RIKEN cDNA 2510003E04 gene	FALSE
230582	gwas.pd.mm	2810410C14Rik	RIKEN cDNA 2810410C14 gene	FALSE
67266	gwas.pd.mm	2900024C23Rik	RIKEN cDNA 2900024C23 gene	FALSE
319909	gwas.pd.mm	5430433G21Rik	RIKEN cDNA 5430433G21 gene	FALSE
217265	gwas.pd.mm	Abca5	ATP-binding cassette, sub-family A (ABC1), member 5	FALSE
271127	gwas.pd.mm	Adamts16	a disintegrin-like and metallopeptidase (reprolysin type) with thrombospondin type 1 motif, 16	FALSE
77739	gwas.pd.mm	Adamtsl1	ADAMTS-like 1	FALSE
11542	gwas.pd.mm	Adora3	adenosine A3 receptor	FALSE
66253	gwas.pd.mm	Aig1	androgen-induced 1	FALSE
11650	gwas.pd.mm	Akp5	alkaline phosphatase 5	FALSE
27052	gwas.pd.mm	Aoah	acyloxyacyl hydrolase	FALSE
11767	gwas.pd.mm	Ap1m1	adaptor-related protein complex AP-1, mu subunit 1	FALSE
66412	gwas.pd.mm	Arrdc4	arrestin domain containing 4	FALSE
57344	gwas.pd.mm	As3mt	arsenic (+3 oxidation state) methyltransferase	FALSE
192113	gwas.pd.mm	Atp12a	ATPase, H+/K+ transporting, nongastric, alpha polypeptide	FALSE
106014	gwas.pd.mm	AW049604	expressed sequence AW049604	FALSE
106522	gwas.pd.mm	AW548124	expressed sequence AW548124	FALSE
12005	gwas.pd.mm	Axin1	axin 1	FALSE
26878	gwas.pd.mm	B3galt2	UDP-Gal:betaGlcNAc beta 1,3-galactosyltransferase, polypeptide 2	FALSE
242248	gwas.pd.mm	Bank1	B-cell scaffold protein with ankyrin repeats 1	FALSE
218333	gwas.pd.mm	BC018507	cDNA sequence BC018507	FALSE
14025	gwas.pd.mm	Bcl11a	B-cell CLL/lymphoma 11A (zinc finger protein)	FALSE
12159	gwas.pd.mm	Bmp4	bone morphogenetic protein 4	FALSE
226089	gwas.pd.mm	C030046E11Rik	RIKEN cDNA C030046E11 gene	FALSE
319776	gwas.pd.mm	C230095G01Rik	RIKEN cDNA C230095G01 gene	FALSE
12279	gwas.pd.mm	C9	complement component 9	FALSE
239857	gwas.pd.mm	Cadm2	cell adhesion molecule 2	FALSE
208908	gwas.pd.mm	Ccdc62	coiled-coil domain containing 62	FALSE
12494	gwas.pd.mm	Cd38	CD38 antigen	FALSE
217946	gwas.pd.mm	Cdca7l	cell division cycle associated 7 like	FALSE
12564	gwas.pd.mm	Cdh8	cadherin 8	FALSE
12608	gwas.pd.mm	Cebpb	CCAAT/enhancer binding protein (C/EBP), beta	FALSE
12617	gwas.pd.mm	Cenpc1	centromere protein C1	FALSE
99100	gwas.pd.mm	Cep152	centrosomal protein 152	FALSE
68755	gwas.pd.mm	Cgrrf1	cell growth regulator with ring finger domain 1	FALSE
81600	gwas.pd.mm	Chia	chitinase, acidic	FALSE
104625	gwas.pd.mm	Cnot6	CCR4-NOT transcription complex, subunit 6	FALSE
69700	gwas.pd.mm	Col22a1	collagen, type XXII, alpha 1	FALSE
12824	gwas.pd.mm	Col2a1	collagen, type II, alpha 1	FALSE
12919	gwas.pd.mm	Crhbp	corticotropin releasing hormone binding protein	FALSE
12921	gwas.pd.mm	Crhr1	corticotropin releasing hormone receptor 1	FALSE
94109	gwas.pd.mm	Csmd1	CUB and Sushi multiple domains 1	FALSE
216033	gwas.pd.mm	Ctnna3	catenin (cadherin associated protein), alpha 3	FALSE
71745	gwas.pd.mm	Cul2	cullin 2	FALSE
13074	gwas.pd.mm	Cyp17a1	cytochrome P450, family 17, subfamily a, polypeptide 1	FALSE
231162	gwas.pd.mm	Cytl1	cytokine like 1	FALSE
52897	gwas.pd.mm	D11Bwg0517e	DNA segment, Chr 11, Brigham & Women's Genetics 0517 expressed	FALSE
76820	gwas.pd.mm	D12Ertd553e	DNA segment, Chr 12, ERATO Doi 553, expressed	FALSE
52662	gwas.pd.mm	D18Ertd653e	DNA segment, Chr 18, ERATO Doi 653, expressed	FALSE
56710	gwas.pd.mm	Dbc1	deleted in bladder cancer 1 (human)	FALSE
110524	gwas.pd.mm	Dgkq	diacylglycerol kinase, theta	FALSE
56419	gwas.pd.mm	Diap3	diaphanous homolog 3 (Drosophila)	FALSE
56811	gwas.pd.mm	Dkk2	dickkopf homolog 2 (Xenopus laevis)	FALSE
23859	gwas.pd.mm	Dlg2	discs, large homolog 2 (Drosophila)	FALSE
13418	gwas.pd.mm	Dnajc1	DnaJ (Hsp40) homolog, subfamily C, member 1	FALSE
434423	gwas.pd.mm	Dppa5a	developmental pluripotency associated 5A	FALSE
240892	gwas.pd.mm	Dusp27	dual specificity phosphatase 27 (putative)	FALSE
68226	gwas.pd.mm	Efcab2	EF-hand calcium binding domain 2	FALSE
434402	gwas.pd.mm	EG434402	predicted gene, EG434402	FALSE
99662	gwas.pd.mm	Eps8l3	ESP8-like 3	FALSE
226090	gwas.pd.mm	Ermp1	endoplasmic reticulum metallopeptidase 1	FALSE
14029	gwas.pd.mm	Evx2	even skipped homeotic gene 2 homolog	FALSE
97827	gwas.pd.mm	Exdl2	exonuclease 3''-5'' domain-like 2	FALSE
14042	gwas.pd.mm	Ext1	exostoses (multiple) 1	FALSE
70864	gwas.pd.mm	Fam47a	family with sequence similarity 47, member A	FALSE
14118	gwas.pd.mm	Fbn1	fibrillin 1	FALSE
57443	gwas.pd.mm	Fbxo3	F-box protein 3	FALSE
14167	gwas.pd.mm	Fgf12	fibroblast growth factor 12	FALSE
14407	gwas.pd.mm	Gabrg3	gamma-aminobutyric acid (GABA-A) receptor, subunit gamma 3	FALSE
108760	gwas.pd.mm	Galntl1	UDP-N-acetyl-alpha-D-galactosamine:polypeptide N-acetylgalactosaminyltransferase-like 1	FALSE
14584	gwas.pd.mm	Gfpt2	glutamine fructose-6-phosphate transaminase 2	FALSE
269132	gwas.pd.mm	Glt25d2	glycosyltransferase 25 domain containing 2	FALSE
223827	gwas.pd.mm	Glt8d3	glycosyltransferase 8 domain containing 3	FALSE
269037	gwas.pd.mm	Gm672	gene model 672, (NCBI)	FALSE
243385	gwas.pd.mm	Gprin3	GPRIN family member 3	FALSE
14968	gwas.pd.mm	H2-Ea	histocompatibility 2, class II antigen E alpha	FALSE
209462	gwas.pd.mm	Hace1	HECT domain and ankyrin repeat containing, E3 ubiquitin protein ligase 1	FALSE
68180	gwas.pd.mm	Hyi	hydroxypyruvate isomerase homolog (E. coli)	FALSE
107527	gwas.pd.mm	Il1rl2	interleukin 1 receptor-like 2	FALSE
16185	gwas.pd.mm	Il2rb	interleukin 2 receptor, beta chain	FALSE
15900	gwas.pd.mm	Irf8	interferon regulatory factor 8	FALSE
16367	gwas.pd.mm	Irs1	insulin receptor substrate 1	FALSE
241226	gwas.pd.mm	Itga8	integrin alpha 8	FALSE
16408	gwas.pd.mm	Itgal	integrin alpha L	FALSE
241447	gwas.pd.mm	Lass6	LAG1 homolog, ceramide synthase 6	FALSE
93689	gwas.pd.mm	Lmod1	leiomodin 1 (smooth muscle)	FALSE
69605	gwas.pd.mm	Lnp	limb and neural patterns	FALSE
66725	gwas.pd.mm	Lrrk2	leucine-rich repeat kinase 2	FALSE
268977	gwas.pd.mm	Ltbp1	latent transforming growth factor beta binding protein 1	FALSE
17089	gwas.pd.mm	Lyar	Ly1 antibody reactive clone	FALSE
26399	gwas.pd.mm	Map2k6	mitogen-activated protein kinase kinase 6	FALSE
26407	gwas.pd.mm	Map3k4	mitogen-activated protein kinase kinase kinase 4	FALSE
17195	gwas.pd.mm	Mbl2	mannose-binding lectin (protein C) 2	FALSE
72039	gwas.pd.mm	Mccc1	methylcrotonoyl-Coenzyme A carboxylase 1 (alpha)	FALSE
107895	gwas.pd.mm	Mgat5	mannoside acetylglucosaminyltransferase 5	FALSE
70945	gwas.pd.mm	Mmrn1	multimerin 1	FALSE
17748	gwas.pd.mm	Mt1	metallothionein 1	FALSE
338352	gwas.pd.mm	Nell1	NEL-like 1 (chicken)	FALSE
18113	gwas.pd.mm	Nnmt	nicotinamide N-methyltransferase	FALSE
18168	gwas.pd.mm	Npy5r	neuropeptide Y receptor Y5	FALSE
18195	gwas.pd.mm	Nsf	N-ethylmaleimide sensitive fusion protein	FALSE
56488	gwas.pd.mm	Nxt1	NTF2-related export protein 1	FALSE
18431	gwas.pd.mm	Oca2	oculocutaneous albinism II	FALSE
18419	gwas.pd.mm	Otog	otogelin	FALSE
328417	gwas.pd.mm	Parp4	poly (ADP-ribose) polymerase family, member 4	FALSE
18505	gwas.pd.mm	Pax3	paired box gene 3	FALSE
18509	gwas.pd.mm	Pax7	paired box gene 7	FALSE
11994	gwas.pd.mm	Pcdh15	protocadherin 15	FALSE
73173	gwas.pd.mm	Pcdh18	protocadherin 18	FALSE
219257	gwas.pd.mm	Pcdh20	protocadherin 20	FALSE
239618	gwas.pd.mm	Pdzrn4	PDZ domain containing RING finger 4	FALSE
74043	gwas.pd.mm	Pex26	peroxisome biogenesis factor 26	FALSE
110094	gwas.pd.mm	Phka2	phosphorylase kinase alpha 2	FALSE
18741	gwas.pd.mm	Pitx2	paired-like homeodomain transcription factor 2	FALSE
665270	gwas.pd.mm	Plb1	phospholipase B1	FALSE
353047	gwas.pd.mm	Plekhm1	pleckstrin homology domain containing, family M (with RUN domain) member 1	FALSE
18815	gwas.pd.mm	Plg	plasminogen	FALSE
54712	gwas.pd.mm	Plxnc1	plexin C1	FALSE
70428	gwas.pd.mm	Polr3b	polymerase (RNA) III (DNA directed) polypeptide B	FALSE
218030	gwas.pd.mm	Pou6f2	POU domain, class 6, transcription factor 2	FALSE
110593	gwas.pd.mm	Prdm2	PR domain containing 2, with ZNF domain	FALSE
228413	gwas.pd.mm	Prrg4	proline rich Gla (G-carboxyglutamic acid) 4 (transmembrane)	FALSE
19268	gwas.pd.mm	Ptprf	protein tyrosine phosphatase, receptor type, F	FALSE
99003	gwas.pd.mm	Qser1	glutamine and serine rich 1	FALSE
53868	gwas.pd.mm	Rab25	RAB25, member RAS oncogene family	FALSE
226422	gwas.pd.mm	Rab7l1	RAB7, member RAS oncogene family-like 1	FALSE
19377	gwas.pd.mm	Rai1	retinoic acid induced 1	FALSE
74213	gwas.pd.mm	Rbm26	RNA binding motif protein 26	FALSE
71137	gwas.pd.mm	Rfx4	regulatory factor X, 4 (influences HLA class II expression)	FALSE
69581	gwas.pd.mm	Rhou	ras homolog gene family, member U	FALSE
19762	gwas.pd.mm	Rit2	Ras-like without CAAX 2	FALSE
380714	gwas.pd.mm	Rph3al	rabphilin 3A-like (without C2 domains)	FALSE
65079	gwas.pd.mm	Rtn4r	reticulon 4 receptor	FALSE
320679	gwas.pd.mm	Samd12	sterile alpha motif domain containing 12	FALSE
74480	gwas.pd.mm	Samd4	sterile alpha motif domain containing 4	FALSE
20276	gwas.pd.mm	Scnn1a	sodium channel, nonvoltage-gated 1 alpha	FALSE
13722	gwas.pd.mm	Scye1	small inducible cytokine subfamily E, member 1	FALSE
20356	gwas.pd.mm	Sema5a	sema domain, seven thrombospondin repeats (type 1 and type 1-like), transmembrane domain (TM) and short cytoplasmic domain, (semaphorin) 5A	FALSE
214968	gwas.pd.mm	Sema6d	sema domain, transmembrane domain (TM), and cytoplasmic domain, (semaphorin) 6D	FALSE
20377	gwas.pd.mm	Sfrp1	secreted frizzled-related protein 1	FALSE
72415	gwas.pd.mm	Sgol1	shugoshin-like 1 (S. pombe)	FALSE
140919	gwas.pd.mm	Slc17a6	solute carrier family 17 (sodium-dependent inorganic phosphate cotransporter), member 6	FALSE
239606	gwas.pd.mm	Slc2a13	solute carrier family 2 (facilitated glucose transporter), member 13	FALSE
98396	gwas.pd.mm	Slc41a1	solute carrier family 41, member 1	FALSE
26570	gwas.pd.mm	Slc7a11	solute carrier family 7 (cationic amino acid transporter, y+ system), member 11	FALSE
20617	gwas.pd.mm	Snca	synuclein, alpha	FALSE
71982	gwas.pd.mm	Snx10	sorting nexin 10	FALSE
58178	gwas.pd.mm	Sorcs1	VPS10 domain receptor protein SORCS 1	FALSE
20666	gwas.pd.mm	Sox11	SRY-box containing gene 11	FALSE
20675	gwas.pd.mm	Sox3	SRY-box containing gene 3	FALSE
77629	gwas.pd.mm	Sphkap	SPHK1 interactor, AKAP domain containing	FALSE
20787	gwas.pd.mm	Srebf1	sterol regulatory element binding transcription factor 1	FALSE
56792	gwas.pd.mm	Stap1	signal transducing adaptor family member 1	FALSE
235469	gwas.pd.mm	Suhw4	suppressor of hairy wing homolog 4 (Drosophila)	FALSE
194974	gwas.pd.mm	Sunc1	Sad1 and UNC84 domain containing 1	FALSE
83770	gwas.pd.mm	Tas1r2	taste receptor, type 1, member 2	FALSE
75812	gwas.pd.mm	Tasp1	taspase, threonine aspartase 1	FALSE
223754	gwas.pd.mm	Tbc1d22a	TBC1 domain family, member 22a	FALSE
21788	gwas.pd.mm	Tfpi	tissue factor pathway inhibitor	FALSE
21834	gwas.pd.mm	Thrb	thyroid hormone receptor beta	FALSE
21898	gwas.pd.mm	Tlr4	toll-like receptor 4	FALSE
81907	gwas.pd.mm	Tmem108	transmembrane protein 108	FALSE
66309	gwas.pd.mm	Tmem128	transmembrane protein 128	FALSE
72160	gwas.pd.mm	Tmem163	transmembrane protein 163	FALSE
72392	gwas.pd.mm	Tmem175	transmembrane protein 175	FALSE
72519	gwas.pd.mm	Tmem55a	transmembrane protein 55A	FALSE
71753	gwas.pd.mm	Tmprss6	transmembrane serine protease 6	FALSE
212999	gwas.pd.mm	Tnpo2	transportin 2 (importin 3, karyopherin beta 2b)	FALSE
29807	gwas.pd.mm	Tpk1	thiamine pyrophosphokinase	FALSE
29869	gwas.pd.mm	Ulk2	Unc-51 like kinase 2 (C. elegans)	FALSE
22249	gwas.pd.mm	Unc13b	unc-13 homolog B (C. elegans)	FALSE
208898	gwas.pd.mm	Unc13c	unc-13 homolog C (C. elegans)	FALSE
14479	gwas.pd.mm	Usp15	ubiquitin specific peptidase 15	FALSE
72344	gwas.pd.mm	Usp36	ubiquitin specific peptidase 36	FALSE
209018	gwas.pd.mm	Vps8	vacuolar protein sorting 8 homolog (S. cerevisiae)	FALSE
67776	gwas.pd.mm	Vwa5a	von Willebrand factor A domain containing 5A	FALSE
319922	gwas.pd.mm	Vwc2	von Willebrand factor C domain containing 2	FALSE
330319	gwas.pd.mm	Wipf3	WAS/WASL interacting protein family, member 3	FALSE
22415	gwas.pd.mm	Wnt3	wingless-related MMTV integration site 3	FALSE
27801	gwas.pd.mm	Zdhhc8	zinc finger, DHHC domain containing 8	FALSE
241494	gwas.pd.mm	Zfp385b	zinc finger protein 385B	FALSE
22702	gwas.pd.mm	Zfp42	zinc finger protein 42	FALSE
320158	gwas.pd.mm	Zmat4	zinc finger, matrin type 4	FALSE
71721	gwas.stroke.mm	1200015N20Rik	RIKEN cDNA 1200015N20 gene	TRUE
67008	gwas.stroke.mm	1600012F09Rik	RIKEN cDNA 1600012F09 gene	TRUE
72148	gwas.stroke.mm	2610019F03Rik	RIKEN cDNA 2610019F03 gene	TRUE
73024	gwas.stroke.mm	2900064A13Rik	RIKEN cDNA 2900064A13 gene	TRUE
217262	gwas.stroke.mm	Abca9	ATP-binding cassette, sub-family A (ABC1), member 9	TRUE
226251	gwas.stroke.mm	Ablim1	actin-binding LIM protein 1	TRUE
110446	gwas.stroke.mm	Acat1	acetyl-Coenzyme A acetyltransferase 1	TRUE
14081	gwas.stroke.mm	Acsl1	acyl-CoA synthetase long-chain family member 1	TRUE
226977	gwas.stroke.mm	Actr1b	ARP1 actin-related protein 1 homolog B, centractin beta (yeast)	TRUE
11518	gwas.stroke.mm	Add1	adducin 1 (alpha)	TRUE
11593	gwas.stroke.mm	Aga	aspartylglucosaminidase	TRUE
11789	gwas.stroke.mm	Apc	adenomatosis polyposis coli	TRUE
494504	gwas.stroke.mm	Apcdd1	adenomatosis polyposis coli down-regulated 1	TRUE
77987	gwas.stroke.mm	Ascc3	activating signal cointegrator 1 complex subunit 3	TRUE
11982	gwas.stroke.mm	Atp10a	ATPase, class V, type 10A	TRUE
11941	gwas.stroke.mm	Atp2b2	ATPase, Ca++ transporting, plasma membrane 2	TRUE
66335	gwas.stroke.mm	Atp6v1c1	ATPase, H+ transporting, lysosomal V1 subunit C1	TRUE
66290	gwas.stroke.mm	Atp6v1g1	ATPase, H+ transporting, lysosomal V1 subunit G1	TRUE
20238	gwas.stroke.mm	Atxn1	ataxin 1	TRUE
12006	gwas.stroke.mm	Axin2	axin2	TRUE
65964	gwas.stroke.mm	B230120H23Rik	RIKEN cDNA B230120H23 gene	TRUE
235461	gwas.stroke.mm	B230380D07Rik	RIKEN cDNA B230380D07 gene	TRUE
277360	gwas.stroke.mm	BC067047	cDNA sequence BC067047	TRUE
12043	gwas.stroke.mm	Bcl2	B-cell leukemia/lymphoma 2	TRUE
228662	gwas.stroke.mm	Btbd3	BTB (POZ) domain containing 3	TRUE
17064	gwas.stroke.mm	Cd93	CD93 antigen	TRUE
12562	gwas.stroke.mm	Cdh5	cadherin 5	TRUE
68916	gwas.stroke.mm	Cdkal1	CDK5 regulatory subunit associated protein 1-like 1	TRUE
244059	gwas.stroke.mm	Chd2	chromodomain helicase DNA binding protein 2	TRUE
66917	gwas.stroke.mm	Chordc1	cysteine and histidine-rich domain (CHORD)-containing, zinc-binding protein 1	TRUE
66797	gwas.stroke.mm	Cntnap2	contactin associated protein-like 2	TRUE
319876	gwas.stroke.mm	Cobll1	Cobl-like 1	TRUE
208647	gwas.stroke.mm	Creb3l2	cAMP responsive element binding protein 3-like 2	TRUE
14007	gwas.stroke.mm	Cugbp2	CUG triplet repeat, RNA binding protein 2	TRUE
242474	gwas.stroke.mm	D730040F13Rik	RIKEN cDNA D730040F13 gene	TRUE
13175	gwas.stroke.mm	Dclk1	doublecortin-like kinase 1	TRUE
66942	gwas.stroke.mm	Ddx18	DEAD (Asp-Glu-Ala-Asp) box polypeptide 18	TRUE
13204	gwas.stroke.mm	Dhx15	DEAH (Asp-Glu-Ala-His) box polypeptide 15	TRUE
192119	gwas.stroke.mm	Dicer1	Dicer1, Dcr-1 homolog (Drosophila)	TRUE
64451	gwas.stroke.mm	Dip2a	DIP2 disco-interacting protein 2 homolog A (Drosophila)	TRUE
50768	gwas.stroke.mm	Dlc1	deleted in liver cancer 1	TRUE
13591	gwas.stroke.mm	Ebf1	early B-cell factor 1	TRUE
13614	gwas.stroke.mm	Edn1	endothelin 1	TRUE
68135	gwas.stroke.mm	Eif3h	eukaryotic translation initiation factor 3, subunit H	TRUE
13713	gwas.stroke.mm	Elk3	ELK3, member of ETS oncogene family	TRUE
270162	gwas.stroke.mm	Elmod1	ELMO domain containing 1	TRUE
74559	gwas.stroke.mm	Elovl7	ELOVL family member 7, elongation of long chain fatty acids (yeast)	TRUE
14011	gwas.stroke.mm	Etv6	ets variant gene 6 (TEL oncogene)	TRUE
14247	gwas.stroke.mm	Fli1	Friend leukemia integration 1	TRUE
399558	gwas.stroke.mm	Flrt2	fibronectin leucine rich transmembrane protein 2	TRUE
14254	gwas.stroke.mm	Flt1	FMS-like tyrosine kinase 1	TRUE
209630	gwas.stroke.mm	Frmd4a	FERM domain containing 4A	TRUE
14461	gwas.stroke.mm	Gata2	GATA binding protein 2	TRUE
14586	gwas.stroke.mm	Gfra2	glial cell line derived neurotrophic factor family receptor alpha 2	TRUE
30926	gwas.stroke.mm	Glrx3	glutaredoxin 3	TRUE
14674	gwas.stroke.mm	Gna13	guanine nucleotide binding protein, alpha 13	TRUE
108071	gwas.stroke.mm	Grm5	glutamate receptor, metabotropic 5	TRUE
56637	gwas.stroke.mm	Gsk3b	glycogen synthase kinase 3 beta	TRUE
80517	gwas.stroke.mm	Herpud2	HERPUD family member 2	TRUE
23908	gwas.stroke.mm	Hs2st1	heparan sulfate 2-O-sulfotransferase 1	TRUE
16403	gwas.stroke.mm	Itga6	integrin alpha 6	TRUE
209378	gwas.stroke.mm	Itih5	inter-alpha (globulin) inhibitor H5	TRUE
16450	gwas.stroke.mm	Jag2	jagged 2	TRUE
668303	gwas.stroke.mm	Kif26a	kinesin family member 26A	TRUE
16563	gwas.stroke.mm	Kif2a	kinesin family member 2A	TRUE
23849	gwas.stroke.mm	Klf6	Kruppel-like factor 6	TRUE
68421	gwas.stroke.mm	Lmbrd1	LMBR1 domain containing 1	TRUE
17069	gwas.stroke.mm	Ly6e	lymphocyte antigen 6 complex, locus E	TRUE
17132	gwas.stroke.mm	Maf	avian musculoaponeurotic fibrosarcoma (v-maf) AS42 oncogene homolog	TRUE
17191	gwas.stroke.mm	Mbd2	methyl-CpG binding domain protein 2	TRUE
56758	gwas.stroke.mm	Mbnl1	muscleblind-like 1 (Drosophila)	TRUE
52065	gwas.stroke.mm	Mfhas1	malignant fibrous histiocytoma amplified sequence 1	TRUE
67468	gwas.stroke.mm	Mmd	monocyte to macrophage differentiation-associated	TRUE
56524	gwas.stroke.mm	Mpp6	membrane protein, palmitoylated 6 (MAGUK p55 subfamily member 6)	TRUE
230075	gwas.stroke.mm	Ndufb6	NADH dehydrogenase (ubiquinone) 1 beta subcomplex, 6	TRUE
75406	gwas.stroke.mm	Ndufs7	NADH dehydrogenase (ubiquinone) Fe-S protein 7	TRUE
18027	gwas.stroke.mm	Nfia	nuclear factor I/A	TRUE
18028	gwas.stroke.mm	Nfib	nuclear factor I/B	TRUE
18029	gwas.stroke.mm	Nfic	nuclear factor I/C	TRUE
18035	gwas.stroke.mm	Nfkbia	nuclear factor of kappa light polypeptide gene enhancer in B-cells inhibitor, alpha	TRUE
18227	gwas.stroke.mm	Nr4a2	nuclear receptor subfamily 4, group A, member 2	TRUE
26428	gwas.stroke.mm	Orc4l	origin recognition complex, subunit 4-like (S. cerevisiae)	TRUE
72587	gwas.stroke.mm	Pan3	PAN3 polyA specific ribonuclease subunit homolog (S. cerevisiae)	TRUE
18514	gwas.stroke.mm	Pbx1	pre B-cell leukemia transcription factor 1	TRUE
110821	gwas.stroke.mm	Pcca	propionyl-Coenzyme A carboxylase, alpha polypeptide	TRUE
18546	gwas.stroke.mm	Pcp4	Purkinje cell protein 4	TRUE
215789	gwas.stroke.mm	Phactr2	phosphatase and actin regulator 2	TRUE
98432	gwas.stroke.mm	Phlpp	PH domain and leucine rich repeat protein phosphatase	TRUE
18718	gwas.stroke.mm	Pip4k2a	phosphatidylinositol-5-phosphate 4-kinase, type II, alpha	TRUE
71795	gwas.stroke.mm	Pitpnc1	phosphatidylinositol transfer protein, cytoplasmic 1	TRUE
18795	gwas.stroke.mm	Plcb1	phospholipase C, beta 1	TRUE
18798	gwas.stroke.mm	Plcb4	phospholipase C, beta 4	TRUE
234779	gwas.stroke.mm	Plcg2	phospholipase C, gamma 2	TRUE
65112	gwas.stroke.mm	Pmepa1	prostate transmembrane protein, androgen induced 1	TRUE
243382	gwas.stroke.mm	Ppm1k	protein phosphatase 1K (PP2C domain containing)	TRUE
226849	gwas.stroke.mm	Ppp2r5a	protein phosphatase 2, regulatory subunit B (B56), alpha isoform	TRUE
107272	gwas.stroke.mm	Psat1	phosphoserine aminotransferase 1	TRUE
66413	gwas.stroke.mm	Psmd6	proteasome (prosome, macropain) 26S subunit, non-ATPase, 6	TRUE
19341	gwas.stroke.mm	Rab4a	RAB4A, member RAS oncogene family	TRUE
217944	gwas.stroke.mm	Rapgef5	Rap guanine nucleotide exchange factor (GEF) 5	TRUE
56878	gwas.stroke.mm	Rbms1	RNA binding motif, single stranded interacting protein 1	TRUE
105014	gwas.stroke.mm	Rdh14	retinol dehydrogenase 14 (all-trans and 9-cis)	TRUE
13476	gwas.stroke.mm	Reep5	receptor accessory protein 5	TRUE
74030	gwas.stroke.mm	Rin2	Ras and Rab interactor 2	TRUE
58809	gwas.stroke.mm	Rnase4	ribonuclease, RNase A family 4	TRUE
68275	gwas.stroke.mm	Rpa1	replication protein A1	TRUE
68750	gwas.stroke.mm	Rreb1	ras responsive element binding protein 1	TRUE
20163	gwas.stroke.mm	Rsu1	Ras suppressor protein 1	TRUE
15529	gwas.stroke.mm	Sdc2	syndecan 2	TRUE
218442	gwas.stroke.mm	Serinc5	serine incorporator 5	TRUE
110809	gwas.stroke.mm	Sfrs1	splicing factor, arginine/serine-rich 1 (ASF/SF2)	TRUE
20437	gwas.stroke.mm	Siah1a	seven in absentia 1A	TRUE
20496	gwas.stroke.mm	Slc12a2	solute carrier family 12, member 2	TRUE
20510	gwas.stroke.mm	Slc1a1	solute carrier family 1 (neuronal/epithelial high affinity glutamate transporter, system Xag), member 1	TRUE
67155	gwas.stroke.mm	Smarca2	SWI/SNF related, matrix associated, actin dependent regulator of chromatin, subfamily a, member 2	TRUE
20646	gwas.stroke.mm	Snrpn	small nuclear ribonucleoprotein N	TRUE
12702	gwas.stroke.mm	Socs3	suppressor of cytokine signaling 3	TRUE
219140	gwas.stroke.mm	Spata13	spermatogenesis associated 13	TRUE
66384	gwas.stroke.mm	Srp19	signal recognition particle 19	TRUE
20442	gwas.stroke.mm	St3gal1	ST3 beta-galactoside alpha-2,3-sialyltransferase 1	TRUE
21687	gwas.stroke.mm	Tek	endothelial-specific receptor tyrosine kinase	TRUE
142980	gwas.stroke.mm	Tlr3	toll-like receptor 3	TRUE
21927	gwas.stroke.mm	Tnfaip1	tumor necrosis factor, alpha-induced protein 1 (endothelial)	TRUE
93679	gwas.stroke.mm	Trim8	tripartite motif protein 8	TRUE
22099	gwas.stroke.mm	Tsn	translin	TRUE
70892	gwas.stroke.mm	Ttll7	tubulin tyrosine ligase-like family, member 7	TRUE
28071	gwas.stroke.mm	Twistnb	TWIST neighbor	TRUE
52837	gwas.stroke.mm	Txndc13	thioredoxin domain containing 13	TRUE
72828	gwas.stroke.mm	Ubash3b	ubiquitin associated and SH3 domain containing, B	TRUE
68795	gwas.stroke.mm	Ubr3	ubiquitin protein ligase E3 component n-recognin 3	TRUE
22319	gwas.stroke.mm	Vamp3	vesicle-associated membrane protein 3	TRUE
30960	gwas.stroke.mm	Vapa	vesicle-associated membrane protein, associated protein A	TRUE
232341	gwas.stroke.mm	Wnk1	WNK lysine deficient protein kinase 1	TRUE
68617	gwas.stroke.mm	1110012J17Rik	RIKEN cDNA 1110012J17 gene	FALSE
67606	gwas.stroke.mm	1110018M03Rik	RIKEN cDNA 1110018M03 gene	FALSE
67467	gwas.stroke.mm	1200011I18Rik	RIKEN cDNA 1200011I18 gene	FALSE
67687	gwas.stroke.mm	1700011L22Rik	RIKEN cDNA 1700011L22 gene	FALSE
72221	gwas.stroke.mm	1700021F07Rik	RIKEN cDNA 1700021F07 gene	FALSE
73419	gwas.stroke.mm	1700052N19Rik	RIKEN cDNA 1700052N19 gene	FALSE
67164	gwas.stroke.mm	2610209A20Rik	RIKEN cDNA 2610209A20 gene	FALSE
320204	gwas.stroke.mm	4833442J19Rik	RIKEN cDNA 4833442J19 gene	FALSE
70920	gwas.stroke.mm	4921511H03Rik	RIKEN cDNA 4921511H03 gene	FALSE
74666	gwas.stroke.mm	4930432K21Rik	RIKEN cDNA 4930432K21 gene	FALSE
74430	gwas.stroke.mm	4930452B06Rik	RIKEN cDNA 4930452B06 gene	FALSE
74720	gwas.stroke.mm	4930511J11Rik	RIKEN cDNA 4930511J11 gene	FALSE
75122	gwas.stroke.mm	4930519B02Rik	RIKEN cDNA 4930519B02 gene	FALSE
75847	gwas.stroke.mm	4930579E17Rik	RIKEN cDNA 4930579E17 gene	FALSE
237397	gwas.stroke.mm	4932409I22Rik	RIKEN cDNA 4932409I22 gene	FALSE
71037	gwas.stroke.mm	4933401F05Rik	RIKEN cDNA 4933401F05 gene	FALSE
74401	gwas.stroke.mm	4933406J08Rik	RIKEN cDNA 4933406J08 gene	FALSE
98496	gwas.stroke.mm	5033414K04Rik	RIKEN cDNA 5033414K04 gene	FALSE
227545	gwas.stroke.mm	5430407P10Rik	RIKEN cDNA 5430407P10 gene	FALSE
338363	gwas.stroke.mm	6030446N20Rik	RIKEN cDNA 6030446N20 gene	FALSE
218989	gwas.stroke.mm	6720456H20Rik	RIKEN cDNA 6720456H20 gene	FALSE
225617	gwas.stroke.mm	9430028L06Rik	RIKEN cDNA 9430028L06 gene	FALSE
68283	gwas.stroke.mm	9530077C05Rik	RIKEN cDNA 9530077C05 gene	FALSE
97159	gwas.stroke.mm	A430005L14Rik	RIKEN cDNA A430005L14 gene	FALSE
319942	gwas.stroke.mm	A530016L24Rik	RIKEN cDNA A530016L24 gene	FALSE
67618	gwas.stroke.mm	Aasdhppt	aminoadipate-semialdehyde dehydrogenase-phosphopantetheinyl transferase	FALSE
11595	gwas.stroke.mm	Acan	aggrecan	FALSE
94191	gwas.stroke.mm	Adarb2	adenosine deaminase, RNA-specific, B2	FALSE
210044	gwas.stroke.mm	Adcy2	adenylate cyclase 2	FALSE
11566	gwas.stroke.mm	Adss	adenylosuccinate synthetase, non muscle	FALSE
11596	gwas.stroke.mm	Ager	advanced glycosylation end product-specific receptor	FALSE
270097	gwas.stroke.mm	AI427515	expressed sequence AI427515	FALSE
621080	gwas.stroke.mm	AI429214	expressed sequence AI429214	FALSE
330941	gwas.stroke.mm	AI593442	expressed sequence AI593442	FALSE
11630	gwas.stroke.mm	Aim1	absent in melanoma 1	FALSE
230959	gwas.stroke.mm	Ajap1	adherens junction associated protein 1	FALSE
229949	gwas.stroke.mm	Ak5	adenylate kinase 5	FALSE
11650	gwas.stroke.mm	Akp5	alkaline phosphatase 5	FALSE
56043	gwas.stroke.mm	Akr1e1	aldo-keto reductase family 1, member E1	FALSE
72535	gwas.stroke.mm	Aldh1b1	aldehyde dehydrogenase 1 family, member B1	FALSE
11727	gwas.stroke.mm	Ang	angiogenin, ribonuclease, RNase A family, 5	FALSE
140577	gwas.stroke.mm	Ankrd6	ankyrin repeat domain 6	FALSE
69787	gwas.stroke.mm	Anxa13	annexin A13	FALSE
23796	gwas.stroke.mm	Aplnr	apelin receptor	FALSE
238055	gwas.stroke.mm	Apob	apolipoprotein B	FALSE
66412	gwas.stroke.mm	Arrdc4	arrestin domain containing 4	FALSE
271970	gwas.stroke.mm	Arsj	arylsulfatase J	FALSE
65257	gwas.stroke.mm	Asb3	ankyrin repeat and SOCS box-containing 3	FALSE
56079	gwas.stroke.mm	Astn2	astrotactin 2	FALSE
53313	gwas.stroke.mm	Atp2a3	ATPase, Ca++ transporting, ubiquitous	FALSE
106014	gwas.stroke.mm	AW049604	expressed sequence AW049604	FALSE
270028	gwas.stroke.mm	AW121567	expressed sequence AW121567	FALSE
215378	gwas.stroke.mm	B830045N13Rik	RIKEN cDNA B830045N13 gene	FALSE
29810	gwas.stroke.mm	Bag3	BCL2-associated athanogene 3	FALSE
210933	gwas.stroke.mm	Bai3	brain-specific angiogenesis inhibitor 3	FALSE
53325	gwas.stroke.mm	Banp	BTG3 associated nuclear protein	FALSE
12022	gwas.stroke.mm	Barx1	BarH-like homeobox 1	FALSE
12023	gwas.stroke.mm	Barx2	BarH-like homeobox 2	FALSE
170442	gwas.stroke.mm	Bbox1	butyrobetaine (gamma), 2-oxoglutarate dioxygenase 1 (gamma-butyrobetaine hydroxylase)	FALSE
80744	gwas.stroke.mm	BC003993	cDNA sequence BC003993	FALSE
234878	gwas.stroke.mm	BC021891	cDNA sequence BC021891	FALSE
235493	gwas.stroke.mm	BC031353	cDNA sequence BC031353	FALSE
212326	gwas.stroke.mm	BC035537	cDNA sequence BC035537	FALSE
330277	gwas.stroke.mm	BC048651	cDNA sequence BC048651	FALSE
12032	gwas.stroke.mm	Bcan	brevican	FALSE
192197	gwas.stroke.mm	Bcas3	breast carcinoma amplified sequence 3	FALSE
12035	gwas.stroke.mm	Bcat1	branched chain aminotransferase 1, cytosolic	FALSE
14025	gwas.stroke.mm	Bcl11a	B-cell CLL/lymphoma 11A (zinc finger protein)	FALSE
66813	gwas.stroke.mm	Bcl2l14	BCL2-like 14 (apoptosis facilitator)	FALSE
80288	gwas.stroke.mm	Bcl9l	B-cell CLL/lymphoma 9-like	FALSE
246229	gwas.stroke.mm	Bivm	basic, immunoglobulin-like variable motif containing	FALSE
66352	gwas.stroke.mm	Blzf1	basic leucine zipper nuclear factor 1	FALSE
12156	gwas.stroke.mm	Bmp2	bone morphogenetic protein 2	FALSE
12163	gwas.stroke.mm	Bmp8a	bone morphogenetic protein 8a	FALSE
67991	gwas.stroke.mm	Btbd14a	BTB (POZ) domain containing 14A	FALSE
215051	gwas.stroke.mm	Bud13	BUD13 homolog (yeast)	FALSE
23829	gwas.stroke.mm	C1ql1	complement component 1, q subcomponent-like 1	FALSE
226359	gwas.stroke.mm	C1ql2	complement component 1, q subcomponent-like 2	FALSE
212632	gwas.stroke.mm	C79267	expressed sequence C79267	FALSE
19777	gwas.stroke.mm	C80913	expressed sequence C80913	FALSE
63955	gwas.stroke.mm	Cables1	Cdk5 and Abl enzyme substrate 1	FALSE
12288	gwas.stroke.mm	Cacna1c	calcium channel, voltage-dependent, L type, alpha 1C subunit	FALSE
12296	gwas.stroke.mm	Cacnb2	calcium channel, voltage-dependent, beta 2 subunit	FALSE
320405	gwas.stroke.mm	Cadps2	Ca2+-dependent activator protein for secretion 2	FALSE
108058	gwas.stroke.mm	Camk2d	calcium/calmodulin-dependent protein kinase II, delta	FALSE
100072	gwas.stroke.mm	Camta1	calmodulin binding transcription activator 1	FALSE
12335	gwas.stroke.mm	Capn3	calpain 3	FALSE
72605	gwas.stroke.mm	Car10	carbonic anhydrase 10	FALSE
76459	gwas.stroke.mm	Car12	carbonic anyhydrase 12	FALSE
319996	gwas.stroke.mm	Casc4	cancer susceptibility candidate 4	FALSE
68201	gwas.stroke.mm	Ccdc34	coiled-coil domain containing 34	FALSE
12447	gwas.stroke.mm	Ccne1	cyclin E1	FALSE
12467	gwas.stroke.mm	Cct6b	chaperonin containing Tcp1, subunit 6b (zeta)	FALSE
12505	gwas.stroke.mm	Cd44	CD44 antigen	FALSE
21948	gwas.stroke.mm	Cd70	CD70 antigen	FALSE
68968	gwas.stroke.mm	Cdan1	congenital dyserythropoietic anemia, type I (human)	FALSE
320873	gwas.stroke.mm	Cdh10	cadherin 10	FALSE
12552	gwas.stroke.mm	Cdh11	cadherin 11	FALSE
12561	gwas.stroke.mm	Cdh4	cadherin 4	FALSE
12614	gwas.stroke.mm	Celsr1	cadherin, EGF LAG seven-pass G-type receptor 1 (flamingo homolog, Drosophila)	FALSE
229841	gwas.stroke.mm	Cenpe	centromere protein E	FALSE
108000	gwas.stroke.mm	Cenpf	centromere protein F	FALSE
12622	gwas.stroke.mm	Cer1	cerberus 1 homolog (Xenopus laevis)	FALSE
12669	gwas.stroke.mm	Chrm1	cholinergic receptor, muscarinic 1, CNS	FALSE
11435	gwas.stroke.mm	Chrna1	cholinergic receptor, nicotinic, alpha polypeptide 1 (muscle)	FALSE
26887	gwas.stroke.mm	Chst4	carbohydrate (chondroitin 6/keratan) sulfotransferase 4	FALSE
71908	gwas.stroke.mm	Cldn23	claudin 23	FALSE
70031	gwas.stroke.mm	Cmtm8	CKLF-like MARVEL transmembrane domain containing 8	FALSE
338349	gwas.stroke.mm	Cntln	centlein, centrosomal protein	FALSE
21367	gwas.stroke.mm	Cntn2	contactin 2	FALSE
69700	gwas.stroke.mm	Col22a1	collagen, type XXII, alpha 1	FALSE
231207	gwas.stroke.mm	Cpeb2	cytoplasmic polyadenylation element binding protein 2	FALSE
57354	gwas.stroke.mm	Cramp1l	Crm, cramped-like (Drosophila)	FALSE
94109	gwas.stroke.mm	Csmd1	CUB and Sushi multiple domains 1	FALSE
239420	gwas.stroke.mm	Csmd3	CUB and Sushi multiple domains 3	FALSE
13009	gwas.stroke.mm	Csrp3	cysteine and glycine-rich protein 3	FALSE
13043	gwas.stroke.mm	Cttn	cortactin	FALSE
65969	gwas.stroke.mm	Cubn	cubilin (intrinsic factor-cobalamin receptor)	FALSE
13047	gwas.stroke.mm	Cux1	cut-like homeobox 1	FALSE
27883	gwas.stroke.mm	D16H22S680E	DNA segment, Chr 16, human D22S680E, expressed	FALSE
73852	gwas.stroke.mm	D3Ertd751e	DNA segment, Chr 3, ERATO Doi 751, expressed	FALSE
330286	gwas.stroke.mm	D630045J12Rik	RIKEN cDNA D630045J12 gene	FALSE
71007	gwas.stroke.mm	D7Ertd443e	DNA segment, Chr 7, ERATO Doi 443, expressed	FALSE
208846	gwas.stroke.mm	Daam1	dishevelled associated activator of morphogenesis 1	FALSE
13134	gwas.stroke.mm	Dach1	dachshund 1 (Drosophila)	FALSE
13166	gwas.stroke.mm	Dbh	dopamine beta hydroxylase	FALSE
68087	gwas.stroke.mm	Dcakd	dephospho-CoA kinase domain containing	FALSE
13176	gwas.stroke.mm	Dcc	deleted in colorectal carcinoma	FALSE
195208	gwas.stroke.mm	Dcdc2a	doublecortin domain containing 2a	FALSE
70762	gwas.stroke.mm	Dclk2	doublecortin-like kinase 2	FALSE
320685	gwas.stroke.mm	Dctd	dCMP deaminase	FALSE
70377	gwas.stroke.mm	Derl3	Der1-like domain family, member 3	FALSE
94223	gwas.stroke.mm	Dgcr8	DiGeorge syndrome critical region gene 8	FALSE
23859	gwas.stroke.mm	Dlg2	discs, large homolog 2 (Drosophila)	FALSE
110083	gwas.stroke.mm	Dnahc12	dynein, axonemal, heavy chain 12	FALSE
13418	gwas.stroke.mm	Dnajc1	DnaJ (Hsp40) homolog, subfamily C, member 1	FALSE
330662	gwas.stroke.mm	Dock1	dedicator of cytokinesis 1	FALSE
94176	gwas.stroke.mm	Dock2	dedicator of cyto-kinesis 2	FALSE
269109	gwas.stroke.mm	Dpp10	dipeptidylpeptidase 10	FALSE
114873	gwas.stroke.mm	Dscaml1	Down syndrome cell adhesion molecule-like 1	FALSE
212898	gwas.stroke.mm	Dse	dermatan sulfate epimerase	FALSE
76843	gwas.stroke.mm	Dtl	denticleless homolog (Drosophila)	FALSE
94245	gwas.stroke.mm	Dtnbp1	dystrobrevin binding protein 1	FALSE
75219	gwas.stroke.mm	Dusp18	dual specificity phosphatase 18	FALSE
240892	gwas.stroke.mm	Dusp27	dual specificity phosphatase 27 (putative)	FALSE
68097	gwas.stroke.mm	Dynll2	dynein light chain LC8-type 2	FALSE
103551	gwas.stroke.mm	E130012A19Rik	RIKEN cDNA E130012A19 gene	FALSE
13557	gwas.stroke.mm	E2f3	E2F transcription factor 3	FALSE
108961	gwas.stroke.mm	E2f8	E2F transcription factor 8	FALSE
67856	gwas.stroke.mm	Echdc3	enoyl Coenzyme A hydratase domain containing 3	FALSE
171211	gwas.stroke.mm	Edaradd	EDAR (ectodysplasin-A receptor)-associated death domain	FALSE
67484	gwas.stroke.mm	Eepd1	endonuclease/exonuclease/phosphatase family domain containing 1	FALSE
66793	gwas.stroke.mm	Efcab1	EF hand calcium binding domain 1	FALSE
574403	gwas.stroke.mm	EG574403	predicted gene, EG574403	FALSE
628779	gwas.stroke.mm	EG628779	predicted gene, EG628779	FALSE
112407	gwas.stroke.mm	Egln3	EGL nine homolog 3 (C. elegans)	FALSE
13661	gwas.stroke.mm	Ehf	ets homologous factor	FALSE
15569	gwas.stroke.mm	Elavl2	ELAV (embryonic lethal, abnormal vision, Drosophila)-like 2 (Hu antigen B)	FALSE
13841	gwas.stroke.mm	Epha7	Eph receptor A7	FALSE
270190	gwas.stroke.mm	Ephb1	Eph receptor B1	FALSE
78943	gwas.stroke.mm	Ern1	endoplasmic reticulum (ER) to nucleus signalling 1	FALSE
67475	gwas.stroke.mm	Ero1lb	ERO1-like beta (S. cerevisiae)	FALSE
13983	gwas.stroke.mm	Esr2	estrogen receptor 2 (beta)	FALSE
66362	gwas.stroke.mm	Exosc3	exosome component 3	FALSE
212377	gwas.stroke.mm	F730047E07Rik	RIKEN cDNA F730047E07 gene	FALSE
338521	gwas.stroke.mm	Fa2h	fatty acid 2-hydroxylase	FALSE
68073	gwas.stroke.mm	Fam173b	family with sequence similarity 173, member B	FALSE
329628	gwas.stroke.mm	Fat4	FAT tumor suppressor homolog 4 (Drosophila)	FALSE
67141	gwas.stroke.mm	Fbxo5	F-box protein 5	FALSE
50753	gwas.stroke.mm	Fbxo8	F-box protein 8	FALSE
114712	gwas.stroke.mm	Ferd3l	Fer3-like (Drosophila)	FALSE
224014	gwas.stroke.mm	Fgd4	FYVE, RhoGEF and PH domain containing 4	FALSE
14167	gwas.stroke.mm	Fgf12	fibroblast growth factor 12	FALSE
14198	gwas.stroke.mm	Fhit	fragile histidine triad gene	FALSE
14236	gwas.stroke.mm	Foxn2	forkhead box N2	FALSE
74123	gwas.stroke.mm	Foxp4	forkhead box P4	FALSE
14302	gwas.stroke.mm	Frk	fyn-related kinase	FALSE
666060	gwas.stroke.mm	Frmpd1	FERM and PDZ domain containing 1	FALSE
23882	gwas.stroke.mm	Gadd45g	growth arrest and DNA-damage-inducible 45 gamma	FALSE
14420	gwas.stroke.mm	Galc	galactosylceramidase	FALSE
230145	gwas.stroke.mm	Galnt12	UDP-N-acetyl-alpha-D-galactosamine:polypeptide N-acetylgalactosaminyltransferase 12	FALSE
380711	gwas.stroke.mm	Garnl4	GTPase activating RANGAP domain-like 4	FALSE
14462	gwas.stroke.mm	Gata3	GATA binding protein 3	FALSE
14465	gwas.stroke.mm	Gata6	GATA binding protein 6	FALSE
74185	gwas.stroke.mm	Gbe1	glucan (1,4-alpha-), branching enzyme 1	FALSE
14629	gwas.stroke.mm	Gclc	glutamate-cysteine ligase, catalytic subunit	FALSE
14654	gwas.stroke.mm	Glra1	glycine receptor, alpha 1 subunit	FALSE
223827	gwas.stroke.mm	Glt8d3	glycosyltransferase 8 domain containing 3	FALSE
195209	gwas.stroke.mm	Gm22	gene model 22, (NCBI)	FALSE
103978	gwas.stroke.mm	Gpc5	glypican 5	FALSE
54672	gwas.stroke.mm	Gpr97	G protein-coupled receptor 97	FALSE
223752	gwas.stroke.mm	Gramd4	GRAM domain containing 4	FALSE
14799	gwas.stroke.mm	Gria1	glutamate receptor, ionotropic, AMPA1 (alpha 1)	FALSE
14804	gwas.stroke.mm	Grid2	glutamate receptor, ionotropic, delta 2	FALSE
14806	gwas.stroke.mm	Grik2	glutamate receptor, ionotropic, kainate 2 (beta 2)	FALSE
110637	gwas.stroke.mm	Grik4	glutamate receptor, ionotropic, kainate 4	FALSE
68705	gwas.stroke.mm	Gtf2f2	general transcription factor IIF, polypeptide 2	FALSE
234889	gwas.stroke.mm	Gucy1a2	guanylate cyclase 1, soluble, alpha 2	FALSE
14919	gwas.stroke.mm	Gucy2e	guanylate cyclase 2e	FALSE
15112	gwas.stroke.mm	Hao1	hydroxyacid oxidase 1, liver	FALSE
56185	gwas.stroke.mm	Hao3	hydroxyacid oxidase (glycolate oxidase) 3	FALSE
79221	gwas.stroke.mm	Hdac9	histone deacetylase 9	FALSE
15186	gwas.stroke.mm	Hdc	histidine decarboxylase	FALSE
67138	gwas.stroke.mm	Herc5	hect domain and RLD 5	FALSE
319149	gwas.stroke.mm	Hist1h3d	histone cluster 1, H3d	FALSE
260423	gwas.stroke.mm	Hist1h3f	histone cluster 1, H3f	FALSE
97114	gwas.stroke.mm	Hist2h3c2	histone cluster 2, H3c2	FALSE
110521	gwas.stroke.mm	Hivep1	human immunodeficiency virus type I enhancer binding protein 1	FALSE
217082	gwas.stroke.mm	Hlf	hepatic leukemia factor	FALSE
30942	gwas.stroke.mm	Hnf4g	hepatocyte nuclear factor 4, gamma	FALSE
235106	gwas.stroke.mm	Hnt	neurotrimin	FALSE
195646	gwas.stroke.mm	Hs3st2	heparan sulfate (glucosamine) 3-O-sulfotransferase 2	FALSE
15492	gwas.stroke.mm	Hsd3b1	hydroxy-delta-5-steroid dehydrogenase, 3 beta- and steroid delta-isomerase 1	FALSE
80888	gwas.stroke.mm	Hspb8	heat shock protein 8	FALSE
15566	gwas.stroke.mm	Htr7	5-hydroxytryptamine (serotonin) receptor 7	FALSE
26559	gwas.stroke.mm	Hunk	hormonally upregulated Neu-associated kinase	FALSE
15902	gwas.stroke.mm	Id2	inhibitor of DNA binding 2	FALSE
68259	gwas.stroke.mm	Ift80	intraflagellar transport 80 homolog (Chlamydomonas)	FALSE
16196	gwas.stroke.mm	Il7	interleukin 7	FALSE
114663	gwas.stroke.mm	Impa2	inositol (myo)-1(or 4)-monophosphatase 2	FALSE
233752	gwas.stroke.mm	Insc	inscuteable homolog (Drosophila)	FALSE
77065	gwas.stroke.mm	Ints7	integrator complex subunit 7	FALSE
380614	gwas.stroke.mm	Intu	inturned planar cell polarity effector homolog (Drosophila)	FALSE
210145	gwas.stroke.mm	Irgc1	immunity-related GTPase family, cinema 1	FALSE
16371	gwas.stroke.mm	Irx1	Iroquois related homeobox 1 (Drosophila)	FALSE
16373	gwas.stroke.mm	Irx3	Iroquois related homeobox 3 (Drosophila)	FALSE
16420	gwas.stroke.mm	Itgb6	integrin beta 6	FALSE
70337	gwas.stroke.mm	Iyd	iodotyrosine deiodinase	FALSE
57339	gwas.stroke.mm	Jph1	junctophilin 1	FALSE
16500	gwas.stroke.mm	Kcnb1	potassium voltage gated channel, Shab-related subfamily, member 1	FALSE
246133	gwas.stroke.mm	Kcne2	potassium voltage-gated channel, Isk-related subfamily, gene 2	FALSE
16510	gwas.stroke.mm	Kcnh1	potassium voltage-gated channel, subfamily H (eag-related), member 1	FALSE
238271	gwas.stroke.mm	Kcnh5	potassium voltage-gated channel, subfamily H (eag-related), member 5	FALSE
80334	gwas.stroke.mm	Kcnip4	Kv channel interacting protein 4	FALSE
56379	gwas.stroke.mm	Kcnj1	potassium inwardly-rectifying channel, subfamily J, member 1	FALSE
16518	gwas.stroke.mm	Kcnj2	potassium inwardly-rectifying channel, subfamily J, member 2	FALSE
16525	gwas.stroke.mm	Kcnk1	potassium channel, subfamily K, member 1	FALSE
110862	gwas.stroke.mm	Kcnq3	potassium voltage-gated channel, subfamily Q, member 3	FALSE
238076	gwas.stroke.mm	Kcns3	potassium voltage-gated channel, delayed-rectifier, subfamily S, member 3	FALSE
240776	gwas.stroke.mm	Kcnt2	potassium channel, subfamily T, member 2	FALSE
72050	gwas.stroke.mm	Kdelc1	KDEL (Lys-Asp-Glu-Leu) containing 1	FALSE
13992	gwas.stroke.mm	Khdrbs3	KH domain containing, RNA binding, signal transduction associated 3	FALSE
269152	gwas.stroke.mm	Kif26b	kinesin family member 26B	FALSE
73470	gwas.stroke.mm	Kif2b	kinesin family member 2B	FALSE
67703	gwas.stroke.mm	Kirrel3	kin of IRRE like 3 (Drosophila)	FALSE
208439	gwas.stroke.mm	Klhl29	kelch-like 29 (Drosophila)	FALSE
53622	gwas.stroke.mm	Krt85	keratin 85	FALSE
16826	gwas.stroke.mm	Ldb2	LIM domain binding 2	FALSE
16867	gwas.stroke.mm	Lhcgr	luteinizing hormone/choriogonadotropin receptor	FALSE
269629	gwas.stroke.mm	Lhfpl3	lipoma HMGIC fusion partner-like 3	FALSE
108030	gwas.stroke.mm	Lin7a	lin-7 homolog A (C. elegans)	FALSE
242384	gwas.stroke.mm	Lingo2	leucine rich repeat and Ig domain containing 2	FALSE
100042150	gwas.stroke.mm	LOC100042150	similar to NTAK alpha2	FALSE
319387	gwas.stroke.mm	Lphn3	latrophilin 3	FALSE
268977	gwas.stroke.mm	Ltbp1	latent transforming growth factor beta binding protein 1	FALSE
26398	gwas.stroke.mm	Map2k4	mitogen-activated protein kinase kinase 4	FALSE
17167	gwas.stroke.mm	Marco	macrophage receptor with collagenous structure	FALSE
192191	gwas.stroke.mm	Med9	mediator of RNA polymerase II transcription, subunit 9 homolog (yeast)	FALSE
67493	gwas.stroke.mm	Mett10d	methyltransferase 10 domain containing	FALSE
30060	gwas.stroke.mm	Mfi2	antigen p97 (melanoma associated) identified by monoclonal antibodies 133.2 and 96.5	FALSE
107895	gwas.stroke.mm	Mgat5	mannoside acetylglucosaminyltransferase 5	FALSE
320878	gwas.stroke.mm	Mical2	microtubule associated monoxygenase, calponin and LIM domain containing 2	FALSE
433938	gwas.stroke.mm	Mn1	meningioma 1	FALSE
17681	gwas.stroke.mm	Msc	musculin	FALSE
17685	gwas.stroke.mm	Msh2	mutS homolog 2 (E. coli)	FALSE
56047	gwas.stroke.mm	Msln	mesothelin	FALSE
110265	gwas.stroke.mm	Msra	methionine sulfoxide reductase A	FALSE
66902	gwas.stroke.mm	Mtap	methylthioadenosine phosphorylase	FALSE
270685	gwas.stroke.mm	Mthfd1l	methylenetetrahydrofolate dehydrogenase (NADP+ dependent) 1-like	FALSE
17877	gwas.stroke.mm	Myf5	myogenic factor 5	FALSE
244281	gwas.stroke.mm	Myo16	myosin XVI	FALSE
214384	gwas.stroke.mm	Myocd	myocardin	FALSE
17930	gwas.stroke.mm	Myom2	myomesin 2	FALSE
635702	gwas.stroke.mm	Naaladl2	N-acetylated alpha-linked acidic dipeptidase-like 2	FALSE
67563	gwas.stroke.mm	Narfl	nuclear prelamin A recognition factor-like	FALSE
18004	gwas.stroke.mm	Nek1	NIMA (never in mitosis gene a)-related expressed kinase 1	FALSE
18030	gwas.stroke.mm	Nfil3	nuclear factor, interleukin 3, regulated	FALSE
29862	gwas.stroke.mm	Ninj2	ninjurin 2	FALSE
432450	gwas.stroke.mm	Nkain2	Na+/K+ transporting ATPase interacting 2	FALSE
171567	gwas.stroke.mm	Nme7	non-metastatic cells 7, protein expressed in (nucleoside-diphosphate kinase)	FALSE
216749	gwas.stroke.mm	Nmur2	neuromedin U receptor 2	FALSE
57753	gwas.stroke.mm	Noc3l	nucleolar complex associated 3 homolog (S. cerevisiae)	FALSE
319211	gwas.stroke.mm	Nol4	nucleolar protein 4	FALSE
230103	gwas.stroke.mm	Npr2	natriuretic peptide receptor 2	FALSE
109648	gwas.stroke.mm	Npy	neuropeptide Y	FALSE
211323	gwas.stroke.mm	Nrg1	neuregulin 1	FALSE
68501	gwas.stroke.mm	Nsmce2	non-SMC element 2 homolog (MMS21, S. cerevisiae)	FALSE
67429	gwas.stroke.mm	Nudcd1	NudC domain containing 1	FALSE
66977	gwas.stroke.mm	Nuf2	NUF2, NDC80 kinetochore complex component, homolog (S. cerevisiae)	FALSE
56488	gwas.stroke.mm	Nxt1	NTF2-related export protein 1	FALSE
23964	gwas.stroke.mm	Odz2	odd Oz/ten-m homolog 2 (Drosophila)	FALSE
23966	gwas.stroke.mm	Odz4	odd Oz/ten-m homolog 4 (Drosophila)	FALSE
380924	gwas.stroke.mm	Olfm4	olfactomedin 4	FALSE
15379	gwas.stroke.mm	Onecut1	one cut domain, family member 1	FALSE
74309	gwas.stroke.mm	Osbp2	oxysterol binding protein 2	FALSE
23967	gwas.stroke.mm	Osr1	odd-skipped related 1 (Drosophila)	FALSE
18419	gwas.stroke.mm	Otog	otogelin	FALSE
18424	gwas.stroke.mm	Otx2	orthodenticle homolog 2 (Drosophila)	FALSE
72333	gwas.stroke.mm	Palld	palladin, cytoskeletal associated protein	FALSE
211347	gwas.stroke.mm	Pank3	pantothenate kinase 3	FALSE
23971	gwas.stroke.mm	Papss1	3'-phosphoadenosine 5'-phosphosulfate synthase 1	FALSE
230577	gwas.stroke.mm	Pars2	prolyl-tRNA synthetase (mitochondrial)(putative)	FALSE
279653	gwas.stroke.mm	Pcdh19	protocadherin 19	FALSE
54216	gwas.stroke.mm	Pcdh7	protocadherin 7	FALSE
270109	gwas.stroke.mm	Pcnxl2	pecanex-like 2 (Drosophila)	FALSE
18549	gwas.stroke.mm	Pcsk2	proprotein convertase subtilisin/kexin type 2	FALSE
18571	gwas.stroke.mm	Pdcd6ip	programmed cell death 6 interacting protein	FALSE
18578	gwas.stroke.mm	Pde4b	phosphodiesterase 4B, cAMP specific	FALSE
29863	gwas.stroke.mm	Pde7b	phosphodiesterase 7B	FALSE
228026	gwas.stroke.mm	Pdk1	pyruvate dehydrogenase kinase, isoenzyme 1	FALSE
71521	gwas.stroke.mm	Pds5a	PDS5, regulator of cohesion maintenance, homolog A (S. cerevisiae)	FALSE
239618	gwas.stroke.mm	Pdzrn4	PDZ domain containing RING finger 4	FALSE
93834	gwas.stroke.mm	Peli2	pellino 2	FALSE
18624	gwas.stroke.mm	Pepd	peptidase D	FALSE
19302	gwas.stroke.mm	Pex2	peroxisome biogenesis factor 2	FALSE
170768	gwas.stroke.mm	Pfkfb3	6-phosphofructo-2-kinase/fructose-2,6-biphosphatase 3	FALSE
18741	gwas.stroke.mm	Pitx2	paired-like homeodomain transcription factor 2	FALSE
18767	gwas.stroke.mm	Pkia	protein kinase inhibitor, alpha	FALSE
78390	gwas.stroke.mm	Pla2g4d	phospholipase A2, group IVD	FALSE
271844	gwas.stroke.mm	Pla2g4f	phospholipase A2, group IVF	FALSE
18779	gwas.stroke.mm	Pla2r1	phospholipase A2 receptor 1	FALSE
18793	gwas.stroke.mm	Plaur	plasminogen activator, urokinase receptor	FALSE
74055	gwas.stroke.mm	Plce1	phospholipase C, epsilon 1	FALSE
213783	gwas.stroke.mm	Plekhg1	pleckstrin homology domain containing, family G (with RhoGef domain) member 1	FALSE
71592	gwas.stroke.mm	Pogk	pogo transposable element with KRAB domain	FALSE
18992	gwas.stroke.mm	Pou3f2	POU domain, class 3, transcription factor 2	FALSE
19017	gwas.stroke.mm	Ppargc1a	peroxisome proliferative activated receptor, gamma, coactivator 1 alpha	FALSE
19059	gwas.stroke.mm	Ppp3r2	protein phosphatase 3, regulatory subunit B, alpha isoform (calcineurin B, type II)	FALSE
109042	gwas.stroke.mm	Prkcdbp	protein kinase C, delta binding protein	FALSE
18761	gwas.stroke.mm	Prkcq	protein kinase C, theta	FALSE
19091	gwas.stroke.mm	Prkg1	protein kinase, cGMP-dependent, type I	FALSE
72981	gwas.stroke.mm	Prkrir	protein-kinase, interferon-inducible double stranded RNA dependent inhibitor, repressor of (P58 repressor)	FALSE
140546	gwas.stroke.mm	Prnpip1	prion protein interacting protein 1	FALSE
19130	gwas.stroke.mm	Prox1	prospero-related homeobox 1	FALSE
19142	gwas.stroke.mm	Prss12	protease, serine, 12 neurotrypsin (motopsin)	FALSE
234353	gwas.stroke.mm	Psd3	pleckstrin and Sec7 domain containing 3	FALSE
17463	gwas.stroke.mm	Psmd7	proteasome (prosome, macropain) 26S subunit, non-ATPase, 7	FALSE
228769	gwas.stroke.mm	Psmf1	proteasome (prosome, macropain) inhibitor subunit 1	FALSE
213527	gwas.stroke.mm	Pth2r	parathyroid hormone 2 receptor	FALSE
218232	gwas.stroke.mm	Ptpdc1	protein tyrosine phosphatase domain containing 1	FALSE
58235	gwas.stroke.mm	Pvrl1	poliovirus receptor-related 1	FALSE
72433	gwas.stroke.mm	Rab38	Rab38, member of RAS oncogene family	FALSE
56044	gwas.stroke.mm	Rala	v-ral simian leukemia viral oncogene homolog A (ras related)	FALSE
76897	gwas.stroke.mm	Ralyl	RALY RNA binding protein-like	FALSE
213464	gwas.stroke.mm	Rbbp5	retinoblastoma binding protein 5	FALSE
207181	gwas.stroke.mm	Rbms3	RNA binding motif, single stranded interacting protein	FALSE
227656	gwas.stroke.mm	Rexo4	REX4, RNA exonuclease 4 homolog (S. cerevisiae)	FALSE
69263	gwas.stroke.mm	Rfc3	replication factor C (activator 1) 3	FALSE
170767	gwas.stroke.mm	Rfxap	regulatory factor X-associated protein	FALSE
19739	gwas.stroke.mm	Rgs9	regulator of G-protein signaling 9	FALSE
75019	gwas.stroke.mm	Rnase10	ribonuclease, RNase A family, 10 (non-active)	FALSE
74194	gwas.stroke.mm	Rnd3	Rho family GTPase 3	FALSE
108089	gwas.stroke.mm	Rnf144a	ring finger protein 144A	FALSE
66743	gwas.stroke.mm	Rnf220	ring finger protein 220	FALSE
19876	gwas.stroke.mm	Robo1	roundabout homolog 1 (Drosophila)	FALSE
26564	gwas.stroke.mm	Ror2	receptor tyrosine kinase-like orphan receptor 2	FALSE
56013	gwas.stroke.mm	RP23-157O10.7	P140 gene	FALSE
68028	gwas.stroke.mm	Rpl22l1	ribosomal protein L22 like 1	FALSE
20192	gwas.stroke.mm	Ryr3	ryanodine receptor 3	FALSE
20689	gwas.stroke.mm	Sall3	sal-like 3 (Drosophila)	FALSE
320679	gwas.stroke.mm	Samd12	sterile alpha motif domain containing 12	FALSE
235293	gwas.stroke.mm	Sc5d	sterol-C5-desaturase (fungal ERG3, delta-5-desaturase) homolog (S. cerevisae)	FALSE
20254	gwas.stroke.mm	Scg2	secretogranin II	FALSE
77371	gwas.stroke.mm	Sec24a	Sec24 related gene family, member A (S. cerevisiae)	FALSE
353282	gwas.stroke.mm	Sfmbt2	Scm-like with four mbt domains 2	FALSE
24052	gwas.stroke.mm	Sgcd	sarcoglycan, delta (dystrophin-associated glycoprotein)	FALSE
20404	gwas.stroke.mm	Sh3gl2	SH3-domain GRB2-like 2	FALSE
230126	gwas.stroke.mm	Shb	src homology 2 domain-containing transforming protein B	FALSE
435684	gwas.stroke.mm	Shf	Src homology 2 domain containing F	FALSE
18399	gwas.stroke.mm	Slc22a6	solute carrier family 22 (organic anion transporter), member 6	FALSE
76376	gwas.stroke.mm	Slc24a2	solute carrier family 24 (sodium/potassium/calcium exchanger), member 2	FALSE
114304	gwas.stroke.mm	Slc28a3	solute carrier family 28 (sodium-coupled nucleoside transporter), member 3	FALSE
72022	gwas.stroke.mm	Slc35f2	solute carrier family 35, member F2	FALSE
241612	gwas.stroke.mm	Slc5a12	solute carrier family 5 (sodium/glucose cotransporter), member 12	FALSE
243616	gwas.stroke.mm	Slc6a11	solute carrier family 6 (neurotransmitter transporter, GABA), member 11	FALSE
103098	gwas.stroke.mm	Slc6a15	solute carrier family 6 (neurotransmitter transporter), member 15	FALSE
20563	gwas.stroke.mm	Slit2	slit homolog 2 (Drosophila)	FALSE
76965	gwas.stroke.mm	Slitrk1	SLIT and NTRK-like family, member 1	FALSE
55994	gwas.stroke.mm	Smad9	MAD homolog 9 (Drosophila)	FALSE
20597	gwas.stroke.mm	Smpd1	sphingomyelin phosphodiesterase 1, acid lysosomal	FALSE
71982	gwas.stroke.mm	Snx10	sorting nexin 10	FALSE
74478	gwas.stroke.mm	Snx29	sorting nexin 29	FALSE
109205	gwas.stroke.mm	Sobp	sine oculis-binding protein homolog (Drosophila)	FALSE
20660	gwas.stroke.mm	Sorl1	sortilin-related receptor, LDLR class A repeats-containing	FALSE
20666	gwas.stroke.mm	Sox11	SRY-box containing gene 11	FALSE
20679	gwas.stroke.mm	Sox6	SRY-box containing gene 6	FALSE
20688	gwas.stroke.mm	Sp4	trans-acting transcription factor 4	FALSE
66722	gwas.stroke.mm	Spag16	sperm associated antigen 16	FALSE
77629	gwas.stroke.mm	Sphkap	SPHK1 interactor, AKAP domain containing	FALSE
20741	gwas.stroke.mm	Spnb1	spectrin beta 1	FALSE
24066	gwas.stroke.mm	Spry4	sprouty homolog 4 (Drosophila)	FALSE
101685	gwas.stroke.mm	Spty2d1	SPT2, Suppressor of Ty, domain containing 1 (S. cerevisiae)	FALSE
243078	gwas.stroke.mm	Srd5a2l2	steroid 5 alpha-reductase 2-like 2	FALSE
259302	gwas.stroke.mm	Srgap3	SLIT-ROBO Rho GTPase activating protein 3	FALSE
72475	gwas.stroke.mm	Ssbp3	single-stranded DNA binding protein 3	FALSE
20450	gwas.stroke.mm	St8sia2	ST8 alpha-N-acetyl-neuraminide alpha-2,8-sialyltransferase 2	FALSE
192188	gwas.stroke.mm	Stab2	stabilin 2	FALSE
668880	gwas.stroke.mm	Stard9	START domain containing 9	FALSE
84112	gwas.stroke.mm	Sucnr1	succinate receptor 1	FALSE
64176	gwas.stroke.mm	Sv2b	synaptic vesicle glycoprotein 2 b	FALSE
72003	gwas.stroke.mm	Synpr	synaptoporin	FALSE
54526	gwas.stroke.mm	Syt10	synaptotagmin X	FALSE
21337	gwas.stroke.mm	Tacr2	tachykinin receptor 2	FALSE
21338	gwas.stroke.mm	Tacr3	tachykinin receptor 3	FALSE
228980	gwas.stroke.mm	Taf4a	TAF4A RNA polymerase II, TATA box binding protein (TBP)-associated factor	FALSE
102162	gwas.stroke.mm	Taf5l	TAF5-like RNA polymerase II, p300/CBP-associated factor (PCAF)-associated factor	FALSE
21353	gwas.stroke.mm	Tank	TRAF family member-associated Nf-kappa B activator	FALSE
110960	gwas.stroke.mm	Tars	threonyl-tRNA synthetase	FALSE
57254	gwas.stroke.mm	Tas2r119	taste receptor, type 2, member 119	FALSE
234724	gwas.stroke.mm	Tat	tyrosine aminotransferase	FALSE
57915	gwas.stroke.mm	Tbc1d1	TBC1 domain family, member 1	FALSE
207592	gwas.stroke.mm	Tbc1d16	TBC1 domain family, member 16	FALSE
67231	gwas.stroke.mm	Tbc1d20	TBC1 domain family, member 20	FALSE
223754	gwas.stroke.mm	Tbc1d22a	TBC1 domain family, member 22a	FALSE
57246	gwas.stroke.mm	Tbx20	T-box 20	FALSE
21386	gwas.stroke.mm	Tbx3	T-box 3	FALSE
70571	gwas.stroke.mm	Tcerg1l	transcription elongation regulator 1-like	FALSE
21420	gwas.stroke.mm	Tcfap2c	transcription factor AP-2, gamma	FALSE
21432	gwas.stroke.mm	Tcl1	T-cell lymphoma breakpoint 1	FALSE
21678	gwas.stroke.mm	Tead3	TEA domain family member 3	FALSE
56746	gwas.stroke.mm	Tex101	testis expressed gene 101	FALSE
241636	gwas.stroke.mm	Tgm6	transglutaminase 6	FALSE
21828	gwas.stroke.mm	Thbs4	thrombospondin 4	FALSE
21830	gwas.stroke.mm	Theg	testicular haploid expressed gene	FALSE
210417	gwas.stroke.mm	Thsd7b	thrombospondin, type I, domain containing 7B	FALSE
67888	gwas.stroke.mm	Tmem100	transmembrane protein 100	FALSE
270893	gwas.stroke.mm	Tmem132e	transmembrane protein 132E	FALSE
72759	gwas.stroke.mm	Tmem135	transmembrane protein 135	FALSE
102566	gwas.stroke.mm	Tmem16k	transmembrane protein 16K	FALSE
74626	gwas.stroke.mm	Tmem81	transmembrane protein 81	FALSE
211499	gwas.stroke.mm	Tmem87a	transmembrane protein 87A	FALSE
228140	gwas.stroke.mm	Tnks1bp1	tankyrase 1 binding protein 1	FALSE
64103	gwas.stroke.mm	Tnmd	tenomodulin	FALSE
233833	gwas.stroke.mm	Tnrc6a	trinucleotide repeat containing 6a	FALSE
29807	gwas.stroke.mm	Tpk1	thiamine pyrophosphokinase	FALSE
277328	gwas.stroke.mm	Trpa1	transient receptor potential cation channel, subfamily A, member 1	FALSE
22066	gwas.stroke.mm	Trpc4	transient receptor potential cation channel, subfamily C, member 4	FALSE
226025	gwas.stroke.mm	Trpm3	transient receptor potential cation channel, subfamily M, member 3	FALSE
83925	gwas.stroke.mm	Trps1	trichorhinophalangeal syndrome I (human)	FALSE
70423	gwas.stroke.mm	Tspan15	tetraspanin 15	FALSE
230576	gwas.stroke.mm	Ttc22	tetratricopeptide repeat domain 22	FALSE
67009	gwas.stroke.mm	Ttc23	tetratricopeptide repeat domain 23	FALSE
239591	gwas.stroke.mm	Ttll8	tubulin tyrosine ligase-like family, member 8	FALSE
69136	gwas.stroke.mm	Tusc1	tumor suppressor candidate 1	FALSE
69116	gwas.stroke.mm	Ubr4	ubiquitin protein ligase E3 component n-recognin 4	FALSE
80914	gwas.stroke.mm	Uck2	uridine-cytidine kinase 2	FALSE
77777	gwas.stroke.mm	Ulbp1	UL16 binding protein 1	FALSE
22269	gwas.stroke.mm	Upk2	uroplakin 2	FALSE
66694	gwas.stroke.mm	Uqcrfs1	ubiquinol-cytochrome c reductase, Rieske iron-sulfur polypeptide 1	FALSE
235441	gwas.stroke.mm	Usp3	ubiquitin specific peptidase 3	FALSE
224836	gwas.stroke.mm	Usp49	ubiquitin specific peptidase 49	FALSE
67883	gwas.stroke.mm	Uxs1	UDP-glucuronate decarboxylase 1	FALSE
22353	gwas.stroke.mm	Vip	vasoactive intestinal polypeptide	FALSE
74199	gwas.stroke.mm	Vit	vitrin	FALSE
319481	gwas.stroke.mm	Wdr59	WD repeat domain 59	FALSE
22411	gwas.stroke.mm	Wnt11	wingless-related MMTV integration site 11	FALSE
229096	gwas.stroke.mm	Ythdf3	YTH domain family 3	FALSE
243983	gwas.stroke.mm	Zdhhc13	zinc finger, DHHC domain containing 13	FALSE
68268	gwas.stroke.mm	Zdhhc21	zinc finger, DHHC domain containing 21	FALSE
380993	gwas.stroke.mm	Zfat	zinc finger and AT hook domain containing	FALSE
329003	gwas.stroke.mm	Zfp516	zinc finger protein 516	FALSE
234725	gwas.stroke.mm	Zfp612	zinc finger protein 612	FALSE
353310	gwas.stroke.mm	Zfp703	zinc finger protein 703	FALSE
